# Supplementary material
Source: publisher site journal article supplement (https://www.spandidos-publications.com/1672/downloadSupplementary)
Supplement: Supplementary file 2 [file downloadSupplementary]

## Sheet: supplementary table 2
Differentially expressed circRNAs for: down_GC_vs_HC Fold Change cut-off: 2.00 P-value cut-off: 0.05 Column A: CircRNAID, the ID of the identified circRNA by DCC. Column B ~ G: edgeR results for differentially expressed circRNAs. Column H ~ Q: junction reads, the junction read number of each sample. Column R ~ AA: logCPM by edgeR. Column AA ~ AE: the coordinates of circRNA. Column AF: circBaseID,…
	GC_vs_HC down regulated circRNAs
	P-value, Fold change and Regulation						junction reads										logCPM by edgeR										Annotations
CircRNAID	logFC	logCPM	LR	PValue	FDR	regulation	GC190121	GC190122	GC190124	GC190125-2	GC190128-2	HC190128-1	HC190128-2	HC190128-3	HC190128-4	HC190128-5	GC190121	GC190122	GC190124	GC190125-2	GC190128-2	HC190128-1	HC190128-2	HC190128-3	HC190128-4	HC190128-5	chrom	txStart	txEnd	strand	circBaseID	source	best_transcript	GeneName	Catalog	predicted_sequence_length	circRNA-associated diseases
chr6:106649847-106665476-	-7.23275	7.18555	12.1431	0.000492702	0.432824	down	0	0	0	0	0	0	0	0	60	0	1.67959	1.67959	1.67959	1.67959	1.67959	1.67959	1.67959	1.67959	10.2429	1.67959	chr6	106649846	106665476	-		novel	NM_004849	ATG5	sense overlapping	15630
chrX:17040246-17047746+	-6.97075	6.97107	10.5785	0.00114413	0.432824	down	0	0	0	0	0	0	0	0	50	0	1.67959	1.67959	1.67959	1.67959	1.67959	1.67959	1.67959	1.67959	9.98067	1.67959	chrX	17040245	17047746	+	hsa_circ_0139983	circBase	NM_004726	REPS2	exonic	374
chr13:36886282-36886614-	-6.95265	6.95561	10.4937	0.00119781	0.432824	down	0	0	0	0	0	0	10	65	3	23	1.67959	1.67959	1.67959	1.67959	1.67959	1.67959	7.19184	8.89989	5.99172	8.2582	chr13	36886281	36886614	-	hsa_circ_0001989	circBase	NM_015087	SPG20	exonic	250
chr1:28337458-28343750-	-6.93446	6.94159	10.3837	0.00127135	0.432824	down	0	0	0	0	0	0	24	8	22	10	1.67959	1.67959	1.67959	1.67959	1.67959	1.67959	8.43632	5.94486	8.80206	7.07606	chr1	28337457	28343750	-	hsa_circ_0011115	circBase	NM_001990	EYA3	exonic	410
chr10:103567487-103567658-	-6.92302	6.93244	10.3213	0.00131503	0.432824	down	0	0	0	0	0	0	21	3	19	20	1.67959	1.67959	1.67959	1.67959	1.67959	1.67959	8.24558	4.64974	8.59219	8.05883	chr10	103567486	103567658	-	hsa_circ_0019618	circBase	NM_012215	MGEA5	exonic	172
chr11:65198240-65211534+	-6.91213	6.92408	10.2545	0.00136352	0.432824	down	0	0	0	0	0	0	0	0	48	0	1.67959	1.67959	1.67959	1.67959	1.67959	1.67959	1.67959	1.67959	9.92197	1.67959	chr11	65198239	65211534	+		novel	NR_131012	NEAT1	sense overlapping	13295
chr10:93699709-93702325-	-6.89685	6.91152	10.1784	0.00142094	0.432824	down	0	0	0	0	0	45	0	1	22	3	1.67959	1.67959	1.67959	1.67959	1.67959	8.85277	1.67959	3.39273	8.80206	5.41688	chr10	93699708	93702325	-		novel	NM_003972	BTAF1	antisense	2617
chr8:37967897-37968351+	-6.83473	6.86256	9.81846	0.00172769	0.432824	down	0	0	0	0	0	0	0	4	44	0	1.67959	1.67959	1.67959	1.67959	1.67959	1.67959	1.67959	5.018	9.79687	1.67959	chr8	37967896	37968351	+	hsa_circ_0083952	circBase	NM_004674	ASH2L	exonic	184
chr12:116674626-116675510-	-6.82648	6.85605	9.77295	0.00177098	0.432824	down	0	0	0	0	0	0	0	6	43	0	1.67959	1.67959	1.67959	1.67959	1.67959	1.67959	1.67959	5.55462	9.76383	1.67959	chr12	116674625	116675510	-	hsa_circ_0008151	circBase	NM_015335	MED13L	sense overlapping	885
chr10:11207449-11259470+	-6.79734	6.83308	9.61845	0.00192632	0.432824	down	0	0	0	0	0	0	0	36	31	0	1.67959	1.67959	1.67959	1.67959	1.67959	1.67959	1.67959	8.05522	9.29381	1.67959	chr10	11207448	11259470	+	hsa_circ_0092638	circBase	NM_006561	CELF2	exonic	280
chr8:141856359-141857700-	-6.70722	6.76302	9.13517	0.00250742	0.432824	down	0	0	0	0	0	42	0	0	20	0	1.67959	1.67959	1.67959	1.67959	1.67959	8.75394	1.67959	1.67959	8.66559	1.67959	chr8	141856358	141857700	-		novel	NM_005607	PTK2	sense overlapping	1342
chr11:66985202-66986874+	-6.68617	6.74646	9.01226	0.00268174	0.432824	down	0	0	0	0	0	0	0	0	41	0	1.67959	1.67959	1.67959	1.67959	1.67959	1.67959	1.67959	1.67959	9.69537	1.67959	chr11	66985201	66986874	+	hsa_circ_0023064	circBase	NM_012308	KDM2A	exonic	270
chr8:6567002-6578424+	-6.65081	6.71921	8.82766	0.00296699	0.432824	down	0	0	0	0	0	0	0	0	40	0	1.67959	1.67959	1.67959	1.67959	1.67959	1.67959	1.67959	1.67959	9.65989	1.67959	chr8	6567001	6578424	+		novel	NM_018361	AGPAT5	intronic	11423
chr12:57033764-57033976-	-6.60395	6.68407	8.6025	0.00335701	0.432824	down	0	0	0	0	0	7	49	0	0	0	1.67959	1.67959	1.67959	1.67959	1.67959	6.22154	9.45924	1.67959	1.67959	1.67959	chr12	57033763	57033976	-		novel	NM_001686	ATP5B	exonic	213
chr11:85737334-85742653-	-6.54137	6.63746	8.29914	0.00396639	0.432824	down	0	0	0	0	0	72	0	0	0	0	1.67959	1.67959	1.67959	1.67959	1.67959	9.52708	1.67959	1.67959	1.67959	1.67959	chr11	85737333	85742653	-	hsa_circ_0002433	circBase	NM_007166	PICALM	exonic	219
chr15:81271107-81274523-	-6.53924	6.63425	8.26287	0.0040464	0.432824	down	0	0	0	0	0	0	0	0	37	0	1.67959	1.67959	1.67959	1.67959	1.67959	1.67959	1.67959	1.67959	9.54788	1.67959	chr15	81271106	81274523	-	hsa_circ_0002255	circBase	T120637	G028499	exonic	945
chr6:76344423-76380436+	-6.50876	6.61259	8.13174	0.0043497	0.432824	down	0	0	0	0	0	49	0	0	11	0	1.67959	1.67959	1.67959	1.67959	1.67959	8.97481	1.67959	1.67959	7.81238	1.67959	chr6	76344422	76380436	+	hsa_circ_0077084	circBase	NM_015571	SENP6	exonic	1039
chr3:130678119-130683889+	-6.50006	6.60479	8.07085	0.00449831	0.432824	down	0	0	0	0	0	0	0	0	36	0	1.67959	1.67959	1.67959	1.67959	1.67959	1.67959	1.67959	1.67959	9.50852	1.67959	chr3	130678118	130683889	+		novel	NM_014382	ATP2C1	exonic	290
chr9:134888551-134889854-	-6.43089	6.55347	7.75193	0.00536552	0.432824	down	0	0	0	0	0	0	6	0	30	0	1.67959	1.67959	1.67959	1.67959	1.67959	1.67959	6.4758	1.67959	9.24675	1.67959	chr9	134888550	134889854	-	hsa_circ_0006825	circBase	NM_004269	MED27	sense overlapping	1304
chr9:108241635-108246783+	-6.41833	6.54401	7.69429	0.00553959	0.432824	down	0	0	0	0	0	0	0	0	34	0	1.67959	1.67959	1.67959	1.67959	1.67959	1.67959	1.67959	1.67959	9.42643	1.67959	chr9	108241634	108246783	+		novel	NM_001145313	FSD1L	exonic	145
chr2:178083765-178086861+	-6.40637	6.53522	7.6419	0.00570279	0.432824	down	0	0	0	0	0	0	1	0	33	0	1.67959	1.67959	1.67959	1.67959	1.67959	1.67959	4.12957	1.67959	9.38357	1.67959	chr2	178083764	178086861	+		novel	NM_194247	HNRNPA3	sense overlapping	3097
chr17:46929868-46933549+	-6.40505	6.5357	7.65197	0.00567103	0.432824	down	0	0	0	0	0	0	47	0	0	0	1.67959	1.67959	1.67959	1.67959	1.67959	1.67959	9.3994	1.67959	1.67959	1.67959	chr17	46929867	46933549	+		novel	NM_005831	CALCOCO2	exonic	306
chr17:64509395-64510584+	-6.40022	6.53254	7.63494	0.00572483	0.432824	down	0	0	0	0	0	0	23	14	0	18	1.67959	1.67959	1.67959	1.67959	1.67959	1.67959	8.3755	6.7197	1.67959	7.90875	chr17	64509394	64510584	+		novel	ENST00000284384	PRKCA	intronic	1190
chr12:43925839-43925998-	-6.37881	6.51683	7.54052	0.00603267	0.432824	down	0	0	0	0	0	0	0	0	0	50	1.67959	1.67959	1.67959	1.67959	1.67959	1.67959	1.67959	1.67959	1.67959	9.37032	chr12	43925838	43925998	-		novel	NM_025003	ADAMTS20	exonic	160
chr5:41749629-41794180-	-6.37566	6.51264	7.50707	0.00614573	0.432824	down	0	0	0	0	0	0	0	0	33	0	1.67959	1.67959	1.67959	1.67959	1.67959	1.67959	1.67959	1.67959	9.38357	1.67959	chr5	41749628	41794180	-		novel	NM_000436	OXCT1	exonic	247
chr5:61653518-61659147+	-6.37355	6.5138	7.52601	0.00608144	0.432824	down	0	0	0	0	0	64	0	0	0	0	1.67959	1.67959	1.67959	1.67959	1.67959	9.35794	1.67959	1.67959	1.67959	1.67959	chr5	61653517	61659147	+		novel	NM_004520	KIF2A	exonic	608
chr1:226453234-226475498-	-6.36409	6.50447	7.45974	0.00630943	0.432824	down	0	0	0	0	0	0	8	0	27	0	1.67959	1.67959	1.67959	1.67959	1.67959	1.67959	6.8778	1.67959	9.0956	1.67959	chr1	226453233	226475498	-	hsa_circ_0112242	circBase	NM_173083	LIN9	exonic	774
chr6:143228148-143238397-	-6.35279	6.49632	7.41174	0.00647996	0.432824	down	0	0	0	0	0	1	0	8	29	0	1.67959	1.67959	1.67959	1.67959	1.67959	3.74482	1.67959	5.94486	9.19811	1.67959	chr6	143228147	143238397	-		novel	GSE61474_TCONS_00293361	GSE61474_XLOC_055671	intronic	10250
chr15:50929619-50941082-	-6.34304	6.49054	7.3826	0.0065858	0.432824	down	0	0	0	0	0	0	45	0	0	0	1.67959	1.67959	1.67959	1.67959	1.67959	1.67959	9.33697	1.67959	1.67959	1.67959	chr15	50929618	50941082	-	hsa_circ_0000601	circBase	NM_017672	TRPM7	exonic	710	Alzheimer's disease, B-cell chronic lymphocytic leukemia, Cerebellar neurodegeneration, Duchenne muscular dystrophy (DMD), Oral Carcinoma, T-cell leukemia, Waldenstrom Macroglobulinemia (WM), acute lymphoblastic leukemia (ALL), acute myeloid leukemia (AML), acute promyelocytic leukemia (APL), autism spectrum disorder (ASD), bladder cancer, breast cancer, cardiac hypertrophy, cardiomyopathy, cervi…
chr8:48812933-48815355-	-6.33169	6.48057	7.31688	0.006831	0.432824	down	0	0	0	0	0	0	0	0	32	0	1.67959	1.67959	1.67959	1.67959	1.67959	1.67959	1.67959	1.67959	9.33939	1.67959	chr8	48812932	48815355	-	hsa_circ_0084415	circBase	NM_006904	PRKDC	exonic	322
chr13:40121370-40127130-	-6.32835	6.48115	7.33151	0.00677562	0.432824	down	0	0	0	0	0	62	0	0	0	0	1.67959	1.67959	1.67959	1.67959	1.67959	9.31237	1.67959	1.67959	1.67959	1.67959	chr13	40121369	40127130	-		novel	NM_005780	LHFP	intronic	5761
chr7:148451092-148457588+	-6.30521	6.46454	7.23305	0.00715737	0.432824	down	0	0	0	0	0	61	0	0	0	0	1.67959	1.67959	1.67959	1.67959	1.67959	9.28903	1.67959	1.67959	1.67959	1.67959	chr7	148451091	148457588	+		novel	NM_003592	CUL1	sense overlapping	6497
chr1:21167349-21191755-	-6.30171	6.46235	7.22117	0.00720488	0.432824	down	0	0	0	0	0	40	0	29	0	0	1.67959	1.67959	1.67959	1.67959	1.67959	8.68409	1.67959	7.74747	1.67959	1.67959	chr1	21167348	21191755	-	hsa_circ_0010458	circBase	NM_003760	EIF4G3	exonic	1439
chr6:6251101-6266917-	-6.28635	6.44778	7.12364	0.00760742	0.432824	down	0	0	0	0	0	0	0	0	31	0	1.67959	1.67959	1.67959	1.67959	1.67959	1.67959	1.67959	1.67959	9.29381	1.67959	chr6	6251100	6266917	-		novel	NM_000129	F13A1	sense overlapping	15817
chr16:53907698-53968021+	-6.28635	6.44778	7.12364	0.00760742	0.432824	down	0	0	0	0	0	0	0	0	31	0	1.67959	1.67959	1.67959	1.67959	1.67959	1.67959	1.67959	1.67959	9.29381	1.67959	chr16	53907697	53968021	+	hsa_circ_0039400	circBase	NM_001080432	FTO	exonic	469
chr6:146185524-146216108-	-6.28635	6.44778	7.12364	0.00760742	0.432824	down	0	0	0	0	0	0	0	0	31	0	1.67959	1.67959	1.67959	1.67959	1.67959	1.67959	1.67959	1.67959	9.29381	1.67959	chr6	146185523	146216108	-	hsa_circ_0130933	circBase	NM_173082	SHPRH	sense overlapping	30585
chr9:86293356-86297981-	-6.26997	6.43664	7.06013	0.00788181	0.432824	down	0	0	0	0	0	2	3	4	24	3	1.67959	1.67959	1.67959	1.67959	1.67959	4.56125	5.52681	5.018	8.92673	5.41688	chr9	86293355	86297981	-	hsa_circ_0001866	circBase	NM_013438	UBQLN1	exonic	538	colorectal cancer, multiple sclerosis, ovarian cancer (OC)
chr15:102248996-102255166-	-6.26664	6.43391	7.04315	0.00795691	0.432824	down	0	0	0	0	0	5	0	0	28	0	1.67959	1.67959	1.67959	1.67959	1.67959	5.76067	1.67959	1.67959	9.14776	1.67959	chr15	102248995	102255166	-	hsa_circ_0006418	circBase	NM_152334	TARSL2	exonic	364
chr8:100443765-100533238+	-6.26385	6.43167	7.02931	0.00801861	0.432824	down	0	0	0	0	0	1	0	0	30	0	1.67959	1.67959	1.67959	1.67959	1.67959	3.74482	1.67959	1.67959	9.24675	1.67959	chr8	100443764	100533238	+	hsa_circ_0085086	circBase	NM_017890	VPS13B	exonic	1738
chr15:50754477-50757388+	-6.25778	6.43074	7.03364	0.00799926	0.432824	down	0	0	0	0	0	59	0	0	0	0	1.67959	1.67959	1.67959	1.67959	1.67959	9.24118	1.67959	1.67959	1.67959	1.67959	chr15	50754476	50757388	+		novel	NM_005154	USP8	exonic	188
chr12:77235805-77243250+	-6.25234	6.42447	6.99008	0.00819626	0.432824	down	0	0	0	0	0	18	0	0	21	0	1.67959	1.67959	1.67959	1.67959	1.67959	7.54575	1.67959	1.67959	8.73544	1.67959	chr12	77235804	77243250	+		novel	NM_015336	ZDHHC17	sense overlapping	7446
chr1:39833820-39833986+	-6.24539	6.42156	6.97871	0.00824849	0.432824	down	0	0	0	0	0	0	4	52	8	0	1.67959	1.67959	1.67959	1.67959	1.67959	1.67959	5.91657	8.58038	7.36063	1.67959	chr1	39833819	39833986	+		novel	NM_012090	MACF1	exonic	167
chr12:51500308-51510203-	-6.23956	6.41424	6.92727	0.00848913	0.432824	down	0	0	0	0	0	0	0	0	30	0	1.67959	1.67959	1.67959	1.67959	1.67959	1.67959	1.67959	1.67959	9.24675	1.67959	chr12	51500307	51510203	-		novel	NM_005653	TFCP2	exonic	566
chr3:10018641-10019130-	-6.23005	6.40838	6.8955	0.00864128	0.432824	down	0	0	0	0	0	0	13	4	19	0	1.67959	1.67959	1.67959	1.67959	1.67959	1.67959	7.56304	5.018	8.59219	1.67959	chr3	10018640	10019130	-	hsa_circ_0064197	circBase	NM_018447	EMC3	exonic	152
chr3:129579783-129599405-	-6.22286	6.40601	6.88851	0.00867517	0.432824	down	0	0	0	0	0	55	0	0	0	2	1.67959	1.67959	1.67959	1.67959	1.67959	9.14045	1.67959	1.67959	1.67959	4.88501	chr3	129579782	129599405	-		novel	ENST00000505616	TMCC1	intronic	19623
chr13:100982815-100992513+	-6.21467	6.39678	6.82622	0.00898291	0.432824	down	0	0	0	0	0	0	0	4	28	0	1.67959	1.67959	1.67959	1.67959	1.67959	1.67959	1.67959	5.018	9.14776	1.67959	chr13	100982814	100992513	+	hsa_circ_0008420	circBase	NM_000282	PCCA	exonic	214
chr14:65332694-65339156-	-6.21041	6.39574	6.82491	0.0089895	0.432824	down	0	0	0	0	0	0	41	0	0	0	1.67959	1.67959	1.67959	1.67959	1.67959	1.67959	9.20337	1.67959	1.67959	1.67959	chr14	65332693	65339156	-		novel	ENST00000542895	SPTB	intronic	6463
chr17:57808782-57812834+	-6.20256	6.39076	6.79718	0.00913019	0.432824	down	0	0	0	0	0	15	18	0	0	13	1.67959	1.67959	1.67959	1.67959	1.67959	7.28766	8.02572	1.67959	1.67959	7.44664	chr17	57808781	57812834	+	hsa_circ_0107276	circBase	NM_030938	VMP1	exonic	238
chr15:43762056-43762264-	-6.1912	6.3799	6.72769	0.00949276	0.432824	down	0	0	0	0	0	0	0	0	29	0	1.67959	1.67959	1.67959	1.67959	1.67959	1.67959	1.67959	1.67959	9.19811	1.67959	chr15	43762055	43762264	-		novel	NM_005657	TP53BP1	exonic	209
chr2:100046302-100052403+	-6.1912	6.3799	6.72769	0.00949276	0.432824	down	0	0	0	0	0	0	0	0	29	0	1.67959	1.67959	1.67959	1.67959	1.67959	1.67959	1.67959	1.67959	9.19811	1.67959	chr2	100046301	100052403	+		novel	NM_016316	REV1	antisense	6102
chr17:35931890-35945538+	-6.1912	6.3799	6.72769	0.00949276	0.432824	down	0	0	0	0	0	0	0	0	29	0	1.67959	1.67959	1.67959	1.67959	1.67959	1.67959	1.67959	1.67959	9.19811	1.67959	chr17	35931889	35945538	+		novel	NM_007247	SYNRG	antisense	13649
chr11:20419123-20424530+	-6.18357	6.37849	6.72817	0.0094902	0.432824	down	0	0	0	0	0	56	0	0	0	0	1.67959	1.67959	1.67959	1.67959	1.67959	9.1663	1.67959	1.67959	1.67959	1.67959	chr11	20419122	20424530	+	hsa_circ_0021501	circBase	NM_005788	PRMT3	exonic	211
chr7:135078670-135082978-	-6.18211	6.37774	6.72439	0.00951034	0.432824	down	0	0	0	0	0	43	0	18	0	0	1.67959	1.67959	1.67959	1.67959	1.67959	8.78764	1.67959	7.07249	1.67959	1.67959	chr7	135078669	135082978	-	hsa_circ_0082490	circBase	NM_013316	CNOT4	exonic	806
chr10:28378600-28414020-	-6.17888	6.37471	6.70511	0.00961371	0.432824	down	0	0	0	0	0	25	0	8	1	18	1.67959	1.67959	1.67959	1.67959	1.67959	8.01274	1.67959	5.94486	4.54515	7.90875	chr10	28378599	28414020	-		novel	NM_173496	MPP7	exonic	676
chr9:128031215-128035928+	-6.16693	6.36538	6.64899	0.00992121	0.432824	down	0	0	0	0	0	0	25	0	0	16	1.67959	1.67959	1.67959	1.67959	1.67959	1.67959	8.49468	1.67959	1.67959	7.74123	chr9	128031214	128035928	+		novel	ENST00000265956	GAPVD1	intronic	4714
chr2:190442945-190443198-	-6.15795	6.36064	6.6246	0.010058	0.432824	down	0	0	0	0	0	55	0	0	0	0	1.67959	1.67959	1.67959	1.67959	1.67959	9.14045	1.67959	1.67959	1.67959	1.67959	chr2	190442944	190443198	-		novel	ENST00000427241	SLC40A1	intronic	254
chr4:25260659-25270825+	-6.14118	6.34473	6.52482	0.0106379	0.432824	down	0	0	0	0	0	0	0	0	28	0	1.67959	1.67959	1.67959	1.67959	1.67959	1.67959	1.67959	1.67959	9.14776	1.67959	chr4	25260658	25270825	+	hsa_circ_0126036	circBase	NM_018323	PI4K2B	exonic	516
chr10:70143555-70154208-	-6.14118	6.34473	6.52482	0.0106379	0.432824	down	0	0	0	0	0	0	0	0	28	0	1.67959	1.67959	1.67959	1.67959	1.67959	1.67959	1.67959	1.67959	9.14776	1.67959	chr10	70143554	70154208	-	hsa_circ_0093948	circBase	NM_017987	RUFY2	exonic	541
chr11:82895721-82895950+	-6.14118	6.34473	6.52482	0.0106379	0.432824	down	0	0	0	0	0	0	0	0	28	0	1.67959	1.67959	1.67959	1.67959	1.67959	1.67959	1.67959	1.67959	9.14776	1.67959	chr11	82895720	82895950	+		novel	NM_015885	PCF11	sense overlapping	230
chr1:147408741-147410931+	-6.14118	6.34473	6.52482	0.0106379	0.432824	down	0	0	0	0	0	0	0	0	28	0	1.67959	1.67959	1.67959	1.67959	1.67959	1.67959	1.67959	1.67959	9.14776	1.67959	chr1	147408740	147410931	+		novel	NM_016334	GPR89B	exonic	164
chr12:123265711-123273476+	-6.13923	6.3459	6.53613	0.0105705	0.432824	down	0	0	0	0	0	0	39	0	0	0	1.67959	1.67959	1.67959	1.67959	1.67959	1.67959	9.13162	1.67959	1.67959	1.67959	chr12	123265710	123273476	+	hsa_circ_0097663	circBase	NM_201435	CCDC62	exonic	441
chr1:172357713-172357949+	-6.13864	6.3468	6.54377	0.0105252	0.432824	down	0	0	0	0	0	4	3	23	0	23	1.67959	1.67959	1.67959	1.67959	1.67959	5.4599	5.52681	7.41865	1.67959	8.2582	chr1	172357712	172357949	+		novel	NM_015569	DNM3	exonic	237
chr17:38567606-38569478-	-6.13188	6.34257	6.52014	0.0106659	0.432824	down	0	0	0	0	0	54	0	0	0	0	1.67959	1.67959	1.67959	1.67959	1.67959	9.11413	1.67959	1.67959	1.67959	1.67959	chr17	38567605	38569478	-		novel	NM_001067	TOP2A	sense overlapping	1873
chr18:59780367-59830889-	-6.13188	6.34257	6.52014	0.0106659	0.432824	down	0	0	0	0	0	54	0	0	0	0	1.67959	1.67959	1.67959	1.67959	1.67959	9.11413	1.67959	1.67959	1.67959	1.67959	chr18	59780366	59830889	-	hsa_circ_0047855	circBase	NM_012327	PIGN	exonic	1592
chr14:35233913-35234139-	-6.13109	6.34116	6.51043	0.0107244	0.432824	down	0	0	0	0	0	16	0	1	0	29	1.67959	1.67959	1.67959	1.67959	1.67959	7.37892	1.67959	3.39273	1.67959	8.58949	chr14	35233912	35234139	-		novel	NM_013448	BAZ1A	exonic	227
chr2:208589524-208598771+	-6.10486	6.3235	6.40965	0.0113502	0.432824	down	0	0	0	0	0	35	0	0	0	14	1.67959	1.67959	1.67959	1.67959	1.67959	8.49305	1.67959	1.67959	1.67959	7.55166	chr2	208589523	208598771	+	hsa_circ_0118936	circBase	NM_152523	CCNYL1	exonic	211
chr20:33057989-33058350+	-6.08938	6.3087	6.31859	0.0119478	0.432824	down	0	0	0	0	0	0	0	0	27	0	1.67959	1.67959	1.67959	1.67959	1.67959	1.67959	1.67959	1.67959	9.0956	1.67959	chr20	33057988	33058350	+		novel	ENST00000483727	ITCH	intronic	362
chr17:20907515-20908303-	-6.08519	6.3109	6.33874	0.0118129	0.432824	down	0	0	0	0	0	0	3	49	0	10	1.67959	1.67959	1.67959	1.67959	1.67959	1.67959	5.52681	8.49539	1.67959	7.07606	chr17	20907514	20908303	-	hsa_circ_0005415	circBase	NM_015276	USP22	exonic	213
chr15:59139496-59144164+	-6.07978	6.30399	6.29461	0.0121106	0.432824	down	0	0	0	0	0	21	0	0	16	0	1.67959	1.67959	1.67959	1.67959	1.67959	7.76461	1.67959	1.67959	8.34651	1.67959	chr15	59139495	59144164	+		novel	NM_001040450	FAM63B	exonic	369
chr12:88513891-88524995-	-6.05068	6.28695	6.20132	0.0127655	0.432824	down	0	0	0	0	0	51	0	0	0	0	1.67959	1.67959	1.67959	1.67959	1.67959	9.03216	1.67959	1.67959	1.67959	1.67959	chr12	88513890	88524995	-		novel	NM_025114	CEP290	exonic	1081
chr7:73654268-73663448-	-6.03566	6.27174	6.10892	0.0134501	0.432824	down	0	0	0	0	0	0	0	0	26	0	1.67959	1.67959	1.67959	1.67959	1.67959	1.67959	1.67959	1.67959	9.04147	1.67959	chr7	73654267	73663448	-	hsa_circ_0080553	circBase	NM_002914	RFC2	exonic	366
chr20:50776662-50782564-	-6.03566	6.27174	6.10892	0.0134501	0.432824	down	0	0	0	0	0	0	0	0	26	0	1.67959	1.67959	1.67959	1.67959	1.67959	1.67959	1.67959	1.67959	9.04147	1.67959	chr20	50776661	50782564	-		novel	NM_018197	ZFP64	exonic	477
chr2:61721029-61722748-	-6.03566	6.27174	6.10892	0.0134501	0.432824	down	0	0	0	0	0	0	0	0	26	0	1.67959	1.67959	1.67959	1.67959	1.67959	1.67959	1.67959	1.67959	9.04147	1.67959	chr2	61721028	61722748	-	hsa_circ_0006033	circBase	NM_003400	XPO1	exonic	357
chr3:142131386-142133133-	-6.03566	6.27174	6.10892	0.0134501	0.432824	down	0	0	0	0	0	0	0	0	26	0	1.67959	1.67959	1.67959	1.67959	1.67959	1.67959	1.67959	1.67959	9.04147	1.67959	chr3	142131385	142133133	-	hsa_circ_0122251	circBase	NM_019001	XRN1	exonic	277
chr3:100002451-100018175+	-6.03566	6.27174	6.10892	0.0134501	0.432824	down	0	0	0	0	0	0	0	0	26	0	1.67959	1.67959	1.67959	1.67959	1.67959	1.67959	1.67959	1.67959	9.04147	1.67959	chr3	100002450	100018175	+	hsa_circ_0066640	circBase	NM_018309	TBC1D23	exonic	821
chr10:74460651-74475660+	-6.03566	6.27174	6.10892	0.0134501	0.432824	down	0	0	0	0	0	0	0	0	26	0	1.67959	1.67959	1.67959	1.67959	1.67959	1.67959	1.67959	1.67959	9.04147	1.67959	chr10	74460650	74475660	+		novel	NM_001270679	MCU	intronic	15010
chr10:114220283-114224416+	-6.03558	6.27289	6.11682	0.0133902	0.432824	down	0	0	0	0	0	0	11	3	17	0	1.67959	1.67959	1.67959	1.67959	1.67959	1.67959	7.32647	4.64974	8.43313	1.67959	chr10	114220282	114224416	+	hsa_circ_0020045	circBase	NM_145206	VTI1A	exonic	170
chr7:50799969-50829711-	-6.0234	6.26981	6.10543	0.0134767	0.432824	down	0	0	0	0	0	0	0	66	0	2	1.67959	1.67959	1.67959	1.67959	1.67959	1.67959	1.67959	8.92177	1.67959	4.88501	chr7	50799968	50829711	-	hsa_circ_0002033	circBase	ENST00000402497	GRB10	intronic	29743
chr4:16212747-16215521-	-6.02257	6.26792	6.09319	0.0135704	0.432824	down	0	0	0	0	0	50	0	0	0	0	1.67959	1.67959	1.67959	1.67959	1.67959	9.00377	1.67959	1.67959	1.67959	1.67959	chr4	16212746	16215521	-		novel	ENST00000399920	TAPT1	intronic	2775
chr17:72749499-72749662+	-6.02257	6.26792	6.09319	0.0135704	0.432824	down	0	0	0	0	0	50	0	0	0	0	1.67959	1.67959	1.67959	1.67959	1.67959	9.00377	1.67959	1.67959	1.67959	1.67959	chr17	72749498	72749662	+		novel	NM_004252	SLC9A3R1	intronic	164
chr10:70161377-70164601-	-6.0174	6.26106	6.05065	0.0139012	0.432824	down	0	0	0	0	0	0	0	18	19	0	1.67959	1.67959	1.67959	1.67959	1.67959	1.67959	1.67959	7.07249	8.59219	1.67959	chr10	70161376	70164601	-	hsa_circ_0093959	circBase	NM_017987	RUFY2	exonic	292
chr5:176402397-176407391-	-6.01703	6.25913	6.03786	0.0140023	0.432824	down	0	0	0	0	0	0	0	0	25	1	1.67959	1.67959	1.67959	1.67959	1.67959	1.67959	1.67959	1.67959	8.98524	4.03351	chr5	176402396	176407391	-		novel	NM_016290	UIMC1	sense overlapping	4995
chr1:94685814-94697199-	-5.99389	6.24863	5.98412	0.0144352	0.432824	down	0	0	0	0	0	49	0	0	0	0	1.67959	1.67959	1.67959	1.67959	1.67959	8.97481	1.67959	1.67959	1.67959	1.67959	chr1	94685813	94697199	-	hsa_circ_0003310	circBase	NM_004815	ARHGAP29	exonic	372
chr6:77921698-77983024-	-5.99176	6.24783	5.9802	0.0144674	0.432824	down	0	0	0	0	0	1	0	47	0	11	1.67959	1.67959	1.67959	1.67959	1.67959	3.74482	1.67959	8.43581	1.67959	7.21044	chr6	77921697	77983024	-	hsa_circ_0132344	circBase	T306912	G071718	exonic	508
chr12:102301964-102313979+	-5.97986	6.23383	5.89947	0.0151455	0.432824	down	0	0	0	0	0	0	0	0	25	0	1.67959	1.67959	1.67959	1.67959	1.67959	1.67959	1.67959	1.67959	8.98524	1.67959	chr12	102301963	102313979	+		novel	NM_018370	DRAM1	exonic	330
chr3:185644389-185650634-	-5.97986	6.23383	5.89947	0.0151455	0.432824	down	0	0	0	0	0	0	0	0	25	0	1.67959	1.67959	1.67959	1.67959	1.67959	1.67959	1.67959	1.67959	8.98524	1.67959	chr3	185644388	185650634	-		novel	ENST00000465245	TRA2B	intronic	6246
chr1:192154017-192154342+	-5.97986	6.23383	5.89947	0.0151455	0.432824	down	0	0	0	0	0	0	0	0	25	0	1.67959	1.67959	1.67959	1.67959	1.67959	1.67959	1.67959	1.67959	8.98524	1.67959	chr1	192154016	192154342	+		novel	NM_130782	RGS18	sense overlapping	326
chr10:112359412-112360888+	-5.97986	6.23383	5.89947	0.0151455	0.432824	down	0	0	0	0	0	0	0	0	25	0	1.67959	1.67959	1.67959	1.67959	1.67959	1.67959	1.67959	1.67959	8.98524	1.67959	chr10	112359411	112360888	+		novel	NM_005445	SMC3	exonic	376
chr6:147660315-147660520+	-5.97163	6.23099	5.88812	0.0152434	0.432824	down	0	0	0	0	0	0	14	13	10	0	1.67959	1.67959	1.67959	1.67959	1.67959	1.67959	7.66821	6.61615	7.67693	1.67959	chr6	147660314	147660520	+		novel	NM_001127715	STXBP5	exonic	108
chr5:66094362-66121584+	-5.96364	6.22302	5.84691	0.0156044	0.432824	down	0	0	0	0	0	0	1	0	24	0	1.67959	1.67959	1.67959	1.67959	1.67959	1.67959	4.12957	1.67959	8.92673	1.67959	chr5	66094361	66121584	+		novel	ENST00000404260	MAST4	intronic	27223
chr13:113219425-113223573-	-5.96356	7.35346	9.87322	0.00167702	0.432824	down	1	0	0	0	0	22	0	0	57	0	4.05022	1.67959	1.67959	1.67959	1.67959	7.83076	1.67959	1.67959	10.1691	1.67959	chr13	113219424	113223573	-	hsa_circ_0030953	circBase	NM_006322	TUBGCP3	exonic	176
chr20:31315700-31315949-	-5.95503	6.22092	5.83988	0.0156669	0.432824	down	0	0	0	0	0	7	20	0	0	10	1.67959	1.67959	1.67959	1.67959	1.67959	6.22154	8.17595	1.67959	1.67959	7.07606	chr20	31315699	31315949	-	hsa_circ_0059797	circBase	NM_053041	COMMD7	exonic	157
chr3:185332352-185341870+	-5.95046	6.21799	5.82571	0.0157936	0.432824	down	0	0	0	0	0	0	0	0	0	37	1.67959	1.67959	1.67959	1.67959	1.67959	1.67959	1.67959	1.67959	1.67959	8.93837	chr3	185332351	185341870	+	hsa_circ_0123064	circBase	NM_021627	SENP2	exonic	678
chr12:122723134-122724492-	-5.94702	6.21531	5.81229	0.0159146	0.432824	down	0	0	0	0	0	0	32	4	0	0	1.67959	1.67959	1.67959	1.67959	1.67959	1.67959	8.84802	5.018	1.67959	1.67959	chr12	122723133	122724492	-	hsa_circ_0097592	circBase	NM_022916	VPS33A	exonic	206
chr2:162223989-162251714+	-5.94115	6.21287	5.80157	0.0160118	0.432824	down	0	0	0	0	0	0	0	21	0	25	1.67959	1.67959	1.67959	1.67959	1.67959	1.67959	1.67959	7.28997	1.67959	8.37729	chr2	162223988	162251714	+	hsa_circ_0007303	circBase	NM_005805	PSMD14	exonic	723
chr5:145539937-145551553-	-5.9348	6.20927	5.78447	0.0161684	0.432824	down	0	0	0	0	0	47	0	0	0	0	1.67959	1.67959	1.67959	1.67959	1.67959	8.91508	1.67959	1.67959	1.67959	1.67959	chr5	145539936	145551553	-	hsa_circ_0128234	circBase	NM_020117	LARS	exonic	494
chr2:61717777-61729445-	-5.92173	6.1949	5.70983	0.0168702	0.432824	down	0	0	0	0	0	0	0	0	24	0	1.67959	1.67959	1.67959	1.67959	1.67959	1.67959	1.67959	1.67959	8.92673	1.67959	chr2	61717776	61729445	-	hsa_circ_0054873	circBase	NM_003400	XPO1	exonic	1721
chr17:16046920-16056709-	-5.90184	6.18514	5.66469	0.0173097	0.432824	down	0	0	0	0	0	0	33	0	0	0	1.67959	1.67959	1.67959	1.67959	1.67959	1.67959	8.89211	1.67959	1.67959	1.67959	chr17	16046919	16056709	-	hsa_circ_0106261	circBase	NM_006311	NCOR1	exonic	441
chr2:238622902-238636578+	-5.90184	6.18514	5.66469	0.0173097	0.432824	down	0	0	0	0	0	0	33	0	0	0	1.67959	1.67959	1.67959	1.67959	1.67959	1.67959	8.89211	1.67959	1.67959	1.67959	chr2	238622901	238636578	+		novel	NM_001137550	LRRFIP1	exonic	261
chr15:76226083-76226820+	-5.90154	6.18162	5.64513	0.0175039	0.432824	down	0	0	0	0	0	0	0	0	23	1	1.67959	1.67959	1.67959	1.67959	1.67959	1.67959	1.67959	1.67959	8.86574	4.03351	chr15	76226082	76226820	+		novel	NM_147188	FBXO22	sense overlapping	738
chr13:37614542-37625720-	-5.88941	6.17713	5.62568	0.0176992	0.432824	down	0	0	0	0	0	3	13	0	2	16	1.67959	1.67959	1.67959	1.67959	1.67959	5.07944	7.56304	1.67959	5.44262	7.74123	chr13	37614541	37625720	-	hsa_circ_0000475	circBase	NM_017569	SUPT20H	exonic	663	Alzheimer's disease, B-cell chronic lymphocytic leukemia, Burkitt lymphoma, Down syndrome (DS), Duchenne muscular dystrophy (DMD), Hodgkin's lymphoma, Oral Carcinoma, acute lymphoblastic leukemia (ALL), acute myeloid leukemia (AML), acute promyelocytic leukemia (APL), adenoma, autism spectrum disorder (ASD), bladder cancer, breast cancer, cardiac hypertrophy, cervical cancer, cholangiocarcinoma, …
chr15:89843031-89844673+	-5.88287	6.17682	5.6269	0.0176869	0.432824	down	0	0	0	0	0	0	0	63	0	0	1.67959	1.67959	1.67959	1.67959	1.67959	1.67959	1.67959	8.85511	1.67959	1.67959	chr15	89843030	89844673	+		PMID:25242744	NM_018193	FANCI	exonic	370
chrX:67454329-67518938-	-5.87319	6.16879	5.58635	0.018101	0.432824	down	0	0	0	0	0	45	0	0	0	0	1.67959	1.67959	1.67959	1.67959	1.67959	8.85277	1.67959	1.67959	1.67959	1.67959	chrX	67454328	67518938	-	hsa_circ_0140512	circBase	NM_002547	OPHN1	exonic	332
chr20:3300209-3303343-	-5.87319	6.16879	5.58635	0.018101	0.432824	down	0	0	0	0	0	45	0	0	0	0	1.67959	1.67959	1.67959	1.67959	1.67959	8.85277	1.67959	1.67959	1.67959	1.67959	chr20	3300208	3303343	-		novel	NM_001009984	C20orf194	sense overlapping	3135
chr4:120189423-120190992+	-5.87319	6.16879	5.58635	0.018101	0.432824	down	0	0	0	0	0	45	0	0	0	0	1.67959	1.67959	1.67959	1.67959	1.67959	8.85277	1.67959	1.67959	1.67959	1.67959	chr4	120189422	120190992	+		novel	NM_019050	USP53	exonic	300
chr5:53390006-53390805-	-5.87162	6.16598	5.57142	0.018256	0.432824	down	0	0	0	0	0	0	0	0	0	35	1.67959	1.67959	1.67959	1.67959	1.67959	1.67959	1.67959	1.67959	1.67959	8.85874	chr5	53390005	53390805	-		novel	ENST00000502271	ARL15	intronic	800
chr13:28840852-28845003+	-5.86689	6.15948	5.53752	0.0186129	0.432824	down	0	0	0	0	0	6	0	0	20	0	1.67959	1.67959	1.67959	1.67959	1.67959	6.00943	1.67959	1.67959	8.66559	1.67959	chr13	28840851	28845003	+	hsa_circ_0000469	circBase	NM_175854	PAN3	exonic	547	prostate cancer
chr20:2928628-2955887+	-5.86511	6.16254	5.5551	0.0184269	0.432824	down	0	0	0	0	0	0	0	14	0	27	1.67959	1.67959	1.67959	1.67959	1.67959	1.67959	1.67959	6.7197	1.67959	8.48729	chr20	2928627	2955887	+		novel	NM_002836	PTPRA	exonic	491
chr2:39107320-39108719+	-5.86412	6.15776	5.52918	0.0187018	0.432824	down	0	0	0	0	0	4	0	0	19	3	1.67959	1.67959	1.67959	1.67959	1.67959	5.4599	1.67959	1.67959	8.59219	5.41688	chr2	39107319	39108719	+	hsa_circ_0119971	circBase	NM_001145450	MORN2	exonic	295
chr5:70337349-70338111-	-5.86118	6.15491	5.51466	0.0188577	0.432824	down	0	0	0	0	0	0	0	0	23	0	1.67959	1.67959	1.67959	1.67959	1.67959	1.67959	1.67959	1.67959	8.86574	1.67959	chr5	70337348	70338111	-	hsa_circ_0002376	circBase	NM_001515	GTF2H2	exonic	207
chr5:68881421-68882183+	-5.86118	6.15491	5.51466	0.0188577	0.432824	down	0	0	0	0	0	0	0	0	23	0	1.67959	1.67959	1.67959	1.67959	1.67959	1.67959	1.67959	1.67959	8.86574	1.67959	chr5	68881420	68882183	+	hsa_circ_0006929	circBase	NM_001042490	GTF2H2C_2	exonic	207
chr17:42501717-42513913-	-5.85817	6.15652	5.5247	0.0187498	0.432824	down	0	0	0	0	0	0	32	0	0	0	1.67959	1.67959	1.67959	1.67959	1.67959	1.67959	8.84802	1.67959	1.67959	1.67959	chr17	42501716	42513913	-	hsa_circ_0003508	circBase	NM_001002909	GPATCH8	exonic	299
chr10:74267913-74326552-	-5.85817	6.15652	5.5247	0.0187498	0.432824	down	0	0	0	0	0	0	32	0	0	0	1.67959	1.67959	1.67959	1.67959	1.67959	1.67959	8.84802	1.67959	1.67959	1.67959	chr10	74267912	74326552	-	hsa_circ_0094103	circBase	NM_006077	MICU1	exonic	659
chr19:54969493-54969700-	-5.85817	6.15652	5.5247	0.0187498	0.432824	down	0	0	0	0	0	0	32	0	0	0	1.67959	1.67959	1.67959	1.67959	1.67959	1.67959	8.84802	1.67959	1.67959	1.67959	chr19	54969492	54969700	-		novel	NM_052925	LENG8	antisense	208
chr8:68070682-68071372+	-5.85794	7.26502	9.23233	0.00237779	0.432824	down	1	0	0	0	0	0	2	0	62	0	4.05022	1.67959	1.67959	1.67959	1.67959	1.67959	4.99112	1.67959	10.2901	1.67959	chr8	68070681	68071372	+		novel	NM_024790	CSPP1	exonic	297
chr8:110422094-110425774+	-5.85661	6.15823	5.53477	0.0186423	0.432824	down	0	0	0	0	0	36	0	10	0	1	1.67959	1.67959	1.67959	1.67959	1.67959	8.53333	1.67959	6.25171	1.67959	4.03351	chr8	110422093	110425774	+		novel	NM_177531	PKHD1L1	exonic	389
chr17:9395146-9408479-	-5.84184	6.14935	5.49166	0.0191074	0.432824	down	0	0	0	0	0	21	0	32	0	0	1.67959	1.67959	1.67959	1.67959	1.67959	7.76461	1.67959	7.88747	1.67959	1.67959	chr17	9395145	9408479	-	hsa_circ_0042066	circBase	NM_004853	STX8	exonic	218
chr16:23894094-23894468+	-5.84137	6.14811	5.48502	0.0191801	0.432824	down	0	0	0	0	0	44	0	0	0	0	1.67959	1.67959	1.67959	1.67959	1.67959	8.82057	1.67959	1.67959	1.67959	1.67959	chr16	23894093	23894468	+		novel	NM_002738	PRKCB	intronic	375
chr18:9522158-9522507-	-5.84137	6.14811	5.48502	0.0191801	0.432824	down	0	0	0	0	0	44	0	0	0	0	1.67959	1.67959	1.67959	1.67959	1.67959	8.82057	1.67959	1.67959	1.67959	1.67959	chr18	9522157	9522507	-		novel	NM_006788	RALBP1	antisense	350
chr12:49093561-49094856-	-5.83662	6.14053	5.44535	0.0196204	0.432824	down	0	0	0	0	0	0	0	0	14	13	1.67959	1.67959	1.67959	1.67959	1.67959	1.67959	1.67959	1.67959	8.15589	7.44664	chr12	49093560	49094856	-	hsa_circ_0026047	circBase	NM_001240	CCNT1	exonic	124
chr6:34256517-34279828-	-5.81315	6.12731	5.38172	0.0203488	0.432824	down	0	0	0	0	0	0	31	0	0	0	1.67959	1.67959	1.67959	1.67959	1.67959	1.67959	8.80254	1.67959	1.67959	1.67959	chr6	34256516	34279828	-		novel	NM_006703	NUDT3	sense overlapping	23312
chr2:223478530-223507724-	-5.80882	6.12713	5.38213	0.020344	0.432824	down	0	0	0	0	0	43	0	0	0	0	1.67959	1.67959	1.67959	1.67959	1.67959	8.78764	1.67959	1.67959	1.67959	1.67959	chr2	223478529	223507724	-		novel	NM_005687	FARSB	exonic	1348
chr17:15974723-15976883-	-5.80882	6.12713	5.38213	0.020344	0.432824	down	0	0	0	0	0	43	0	0	0	0	1.67959	1.67959	1.67959	1.67959	1.67959	8.78764	1.67959	1.67959	1.67959	1.67959	chr17	15974722	15976883	-	hsa_circ_0106243	circBase	NM_006311	NCOR1	exonic	482
chr4:57045512-57138658+	-5.798	6.11379	5.31371	0.0211582	0.432824	down	0	0	0	0	0	0	0	0	22	0	1.67959	1.67959	1.67959	1.67959	1.67959	1.67959	1.67959	1.67959	8.80206	1.67959	chr4	57045511	57138658	+		novel	NM_020722	KIAA1211	sense overlapping	93147
chrM:7998-15626-	-5.798	6.11379	5.31371	0.0211582	0.432824	down	0	0	0	0	0	0	0	0	22	0	1.67959	1.67959	1.67959	1.67959	1.67959	1.67959	1.67959	1.67959	8.80206	1.67959	chrM	7997	15626	-		novel	uc022bqs.1	JA760602	sense overlapping	7629
chr7:127970872-127976096-	-5.798	6.11379	5.31371	0.0211582	0.432824	down	0	0	0	0	0	0	0	0	22	0	1.67959	1.67959	1.67959	1.67959	1.67959	1.67959	1.67959	1.67959	8.80206	1.67959	chr7	127970871	127976096	-		novel	NM_018077	RBM28	exonic	516
chr14:31771501-31771725-	-5.798	6.11379	5.31371	0.0211582	0.432824	down	0	0	0	0	0	0	0	0	22	0	1.67959	1.67959	1.67959	1.67959	1.67959	1.67959	1.67959	1.67959	8.80206	1.67959	chr14	31771500	31771725	-		novel	NM_015473	HEATR5A	exonic	225
chr5:89791516-89793523+	-5.798	6.11379	5.31371	0.0211582	0.432824	down	0	0	0	0	0	0	0	0	22	0	1.67959	1.67959	1.67959	1.67959	1.67959	1.67959	1.67959	1.67959	8.80206	1.67959	chr5	89791515	89793523	+		novel	NM_006467	POLR3G	sense overlapping	2008
chr3:182804481-182812393-	-5.798	6.11379	5.31371	0.0211582	0.432824	down	0	0	0	0	0	0	0	0	22	0	1.67959	1.67959	1.67959	1.67959	1.67959	1.67959	1.67959	1.67959	8.80206	1.67959	chr3	182804480	182812393	-	hsa_circ_0068148	circBase	NM_020166	MCCC1	exonic	280
chr12:57689182-57704246-	-5.79622	6.11346	5.31251	0.0211729	0.432824	down	0	0	0	0	0	0	0	0	18	6	1.67959	1.67959	1.67959	1.67959	1.67959	1.67959	1.67959	1.67959	8.51485	6.36175	chr12	57689181	57704246	-	hsa_circ_0098870	circBase	NM_014925	R3HDM2	exonic	845
chr9:36249189-36249394-	-5.78945	6.11191	5.30617	0.02125	0.432824	down	0	0	0	0	0	21	1	0	9	2	1.67959	1.67959	1.67959	1.67959	1.67959	7.76461	4.12957	1.67959	7.52743	4.88501	chr9	36249188	36249394	-		novel	NM_005476	GNE	exonic	206
chr19:34921481-34924317+	-5.77697	6.10517	5.2737	0.0216499	0.432824	down	0	0	0	0	0	17	18	0	0	0	1.67959	1.67959	1.67959	1.67959	1.67959	7.46475	8.02572	1.67959	1.67959	1.67959	chr19	34921480	34924317	+	hsa_circ_0050509	circBase	NM_005499	UBA2	exonic	220
chr1:180053153-180059931+	-5.77552	6.10584	5.27765	0.0216009	0.432824	down	0	0	0	0	0	42	0	0	0	0	1.67959	1.67959	1.67959	1.67959	1.67959	8.75394	1.67959	1.67959	1.67959	1.67959	chr1	180053152	180059931	+		novel	NM_014810	CEP350	exonic	384
chr12:123497160-123498589-	-5.77268	6.10428	5.2701	0.0216947	0.432824	down	0	0	0	0	0	0	11	37	0	0	1.67959	1.67959	1.67959	1.67959	1.67959	1.67959	7.32647	8.09428	1.67959	1.67959	chr12	123497159	123498589	-	hsa_circ_0029170	circBase	NM_020845	PITPNM2	exonic	337
chr6:20480077-20483232+	-5.76789	6.10077	5.25268	0.021913	0.432824	down	0	0	0	0	0	0	14	31	0	0	1.67959	1.67959	1.67959	1.67959	1.67959	1.67959	7.66821	7.84229	1.67959	1.67959	chr6	20480076	20483232	+		novel	NM_001949	E2F3	sense overlapping	3156
chr4:39850471-39874764-	-5.74143	6.08423	5.17152	0.0229601	0.432824	down	0	0	0	0	0	41	0	0	0	0	1.67959	1.67959	1.67959	1.67959	1.67959	8.71944	1.67959	1.67959	1.67959	1.67959	chr4	39850470	39874764	-		novel	NM_001100399	PDS5A	exonic	1062
chr11:101416502-101433256-	-5.74143	6.08423	5.17152	0.0229601	0.432824	down	0	0	0	0	0	41	0	0	0	0	1.67959	1.67959	1.67959	1.67959	1.67959	8.71944	1.67959	1.67959	1.67959	1.67959	chr11	101416501	101433256	-		novel	ENST00000348423	TRPC6	intronic	16755
chr9:114904600-114929968-	-5.73776	6.07895	5.14462	0.0233186	0.432824	down	0	0	0	0	0	0	28	0	1	0	1.67959	1.67959	1.67959	1.67959	1.67959	1.67959	8.6568	1.67959	4.54515	1.67959	chr9	114904599	114929968	-		novel	NR_036085	MIR3134	intronic	25369
chr15:72810408-72853890+	-5.73534	6.08115	5.15668	0.0231572	0.432824	down	0	0	0	0	0	25	0	22	0	0	1.67959	1.67959	1.67959	1.67959	1.67959	8.01274	1.67959	7.35574	1.67959	1.67959	chr15	72810407	72853890	+	hsa_circ_0000629	circBase	NM_005744	ARIH1	exonic	429	Alzheimer's disease, B-cell chronic lymphocytic leukemia, Duchenne muscular dystrophy (DMD), Oral Carcinoma, acute myeloid leukemia (AML), acute promyelocytic leukemia (APL), autism spectrum disorder (ASD), bladder cancer, breast cancer, cardiac hypertrophy, chronic lymphocytic leukemia (CLL), colorectal cancer, epithelial ovarian cancer (EOC), glioblastoma, glioma, hepatocellular carcinoma (HCC)…
chr9:135172274-135187243-	-5.73414	6.08015	5.15166	0.0232241	0.432824	down	0	0	0	0	0	30	0	15	0	0	1.67959	1.67959	1.67959	1.67959	1.67959	8.27279	1.67959	6.81631	1.67959	1.67959	chr9	135172273	135187243	-	hsa_circ_0089282	circBase	NM_015046	SETX	exonic	675
chr16:2663961-2752479+	-5.73197	6.07147	5.10672	0.0238334	0.432824	down	0	0	0	0	0	0	0	0	21	0	1.67959	1.67959	1.67959	1.67959	1.67959	1.67959	1.67959	1.67959	8.73544	1.67959	chr16	2663960	2752479	+		novel	NM_018992	KCTD5	sense overlapping	88519
chr5:75902004-75936928+	-5.73197	6.07147	5.10672	0.0238334	0.432824	down	0	0	0	0	0	0	0	0	21	0	1.67959	1.67959	1.67959	1.67959	1.67959	1.67959	1.67959	1.67959	8.73544	1.67959	chr5	75902003	75936928	+		novel	NM_001285460	IQGAP2	exonic	862
chr3:160021703-160099506-	-5.73197	6.07147	5.10672	0.0238334	0.432824	down	0	0	0	0	0	0	0	0	21	0	1.67959	1.67959	1.67959	1.67959	1.67959	1.67959	1.67959	1.67959	8.73544	1.67959	chr3	160021702	160099506	-		novel	NM_001190241	IFT80	exonic	1108
chr16:2745936-2752479+	-5.73197	6.07147	5.10672	0.0238334	0.432824	down	0	0	0	0	0	0	0	0	21	0	1.67959	1.67959	1.67959	1.67959	1.67959	1.67959	1.67959	1.67959	8.73544	1.67959	chr16	2745935	2752479	+		novel	NM_018992	KCTD5	exonic	423
chr7:72617463-72619498+	-5.73197	6.07147	5.10672	0.0238334	0.432824	down	0	0	0	0	0	0	0	0	21	0	1.67959	1.67959	1.67959	1.67959	1.67959	1.67959	1.67959	1.67959	8.73544	1.67959	chr7	72617462	72619498	+	hsa_circ_0080469	circBase	NR_003580	GTF2IP4	exonic	160
chr7:76871008-76891624+	-5.73197	6.07147	5.10672	0.0238334	0.432824	down	0	0	0	0	0	0	0	0	21	0	1.67959	1.67959	1.67959	1.67959	1.67959	1.67959	1.67959	1.67959	8.73544	1.67959	chr7	76871007	76891624	+	hsa_circ_0134669	circBase	NM_020879	CCDC146	exonic	934
chr8:87162207-87162373+	-5.73197	6.07147	5.10672	0.0238334	0.432824	down	0	0	0	0	0	0	0	0	21	0	1.67959	1.67959	1.67959	1.67959	1.67959	1.67959	1.67959	1.67959	8.73544	1.67959	chr8	87162206	87162373	+		novel	NM_152565	ATP6V0D2	sense overlapping	167
chr11:71693853-71701763+	-5.71866	6.06707	5.0864	0.0241141	0.432824	down	0	0	0	0	0	0	29	0	0	0	1.67959	1.67959	1.67959	1.67959	1.67959	1.67959	8.70704	1.67959	1.67959	1.67959	chr11	71693852	71701763	+	hsa_circ_0096369	circBase	ENST00000533380	RNF121	intronic	7911
chr6:18236683-18250070-	-5.71866	6.06707	5.0864	0.0241141	0.432824	down	0	0	0	0	0	0	29	0	0	0	1.67959	1.67959	1.67959	1.67959	1.67959	1.67959	8.70704	1.67959	1.67959	1.67959	chr6	18236682	18250070	-	hsa_circ_0131430	circBase	NM_003472	DEK	exonic	474
chr17:34910661-34923615+	-5.71637	6.07045	5.10445	0.0238645	0.432824	down	0	0	0	0	0	0	0	56	0	0	1.67959	1.67959	1.67959	1.67959	1.67959	1.67959	1.67959	8.68643	1.67959	1.67959	chr17	34910660	34923615	+	hsa_circ_0003930	circBase	NM_024835	GGNBP2	exonic	548
chr13:77817194-77818086-	-5.71268	6.06364	5.06965	0.0243484	0.432824	down	0	0	0	0	0	0	13	11	4	5	1.67959	1.67959	1.67959	1.67959	1.67959	1.67959	7.56304	6.38369	6.38848	6.10991	chr13	77817193	77818086	-	hsa_circ_0030522	circBase	NM_015057	MYCBP2	exonic	248
chr10:11317020-11356233+	-5.71	6.0633	5.06838	0.0243662	0.432824	down	0	0	0	0	0	0	19	19	0	0	1.67959	1.67959	1.67959	1.67959	1.67959	1.67959	8.10279	7.14869	1.67959	1.67959	chr10	11317019	11356233	+	hsa_circ_0092690	circBase	NM_001083591	CELF2	exonic	331
chr10:12123471-12136270+	-5.71	6.0633	5.06838	0.0243662	0.432824	down	0	0	0	0	0	0	19	19	0	0	1.67959	1.67959	1.67959	1.67959	1.67959	1.67959	8.10279	7.14869	1.67959	1.67959	chr10	12123470	12136270	+	hsa_circ_0004630	circBase	NM_018706	DHTKD1	exonic	1204
chr11:108172375-108175579+	-5.70988	6.06043	5.05354	0.0245757	0.432824	down	0	0	0	0	0	0	0	18	14	0	1.67959	1.67959	1.67959	1.67959	1.67959	1.67959	1.67959	7.07249	8.15589	1.67959	chr11	108172374	108175579	+	hsa_circ_0005583	circBase	NM_000051	ATM	exonic	497
chr17:11958206-11969522+	-5.70762	6.06032	5.05333	0.0245787	0.432824	down	0	0	0	0	0	0	0	26	11	0	1.67959	1.67959	1.67959	1.67959	1.67959	1.67959	1.67959	7.5924	7.81238	1.67959	chr17	11958205	11969522	+		novel	ENST00000538465	MAP2K4	intronic	11317
chr17:80714041-80721938+	-5.70731	6.06034	5.05348	0.0245765	0.432824	down	0	0	0	0	0	0	14	0	0	16	1.67959	1.67959	1.67959	1.67959	1.67959	1.67959	7.66821	1.67959	1.67959	7.74123	chr17	80714040	80721938	+	hsa_circ_0046446	circBase	NM_005993	TBCD	exonic	149
chr20:50090602-50092104-	-5.70652	6.06229	5.06372	0.0244317	0.432824	down	0	0	0	0	0	40	0	0	0	0	1.67959	1.67959	1.67959	1.67959	1.67959	8.68409	1.67959	1.67959	1.67959	1.67959	chr20	50090601	50092104	-		novel	NM_012340	NFATC2	sense overlapping	1503
chr9:17143286-17226285+	-5.70652	6.06229	5.06372	0.0244317	0.432824	down	0	0	0	0	0	40	0	0	0	0	1.67959	1.67959	1.67959	1.67959	1.67959	8.68409	1.67959	1.67959	1.67959	1.67959	chr9	17143285	17226285	+		novel	NM_017738	CNTLN	exonic	174
chr19:5047487-5071070+	-5.70652	6.06229	5.06372	0.0244317	0.432824	down	0	0	0	0	0	40	0	0	0	0	1.67959	1.67959	1.67959	1.67959	1.67959	8.68409	1.67959	1.67959	1.67959	1.67959	chr19	5047486	5071070	+	hsa_circ_0048696	circBase	NM_015015	KDM4B	exonic	244
chr13:49719914-49749677+	-5.69969	6.05595	5.03202	0.0248829	0.432824	down	0	0	0	0	0	0	0	0	0	31	1.67959	1.67959	1.67959	1.67959	1.67959	1.67959	1.67959	1.67959	1.67959	8.68493	chr13	49719913	49749677	+	hsa_circ_0030246	circBase	NM_014923	FNDC3A	exonic	711
chr1:112237963-112240119+	-5.69969	6.05595	5.03202	0.0248829	0.432824	down	0	0	0	0	0	0	0	0	0	31	1.67959	1.67959	1.67959	1.67959	1.67959	1.67959	1.67959	1.67959	1.67959	8.68493	chr1	112237962	112240119	+		novel	NM_002884	RAP1A	exonic	126
chr2:215657021-215661841-	-5.69969	6.05595	5.03202	0.0248829	0.432824	down	0	0	0	0	0	0	0	0	0	31	1.67959	1.67959	1.67959	1.67959	1.67959	1.67959	1.67959	1.67959	1.67959	8.68493	chr2	215657020	215661841	-	hsa_circ_0003484	circBase	NM_000465	BARD1	exonic	206
chr1:1770629-1779968-	-5.69887	6.05071	5.00512	0.0252725	0.432824	down	0	0	0	0	0	1	0	0	20	0	1.67959	1.67959	1.67959	1.67959	1.67959	3.74482	1.67959	1.67959	8.66559	1.67959	chr1	1770628	1779968	-		novel	NM_001282539	GNB1	intronic	9340
chr17:3988964-3989949-	-5.69266	6.0537	5.02156	0.0250337	0.432824	down	0	0	0	0	0	28	0	9	0	4	1.67959	1.67959	1.67959	1.67959	1.67959	8.17432	1.67959	6.10643	1.67959	5.80461	chr17	3988963	3989949	-	hsa_circ_0006631	circBase	NM_015113	ZZEF1	exonic	304
chr2:58312016-58313561+	-5.69135	6.05046	5.00503	0.0252737	0.432824	down	0	0	0	0	0	26	0	0	7	0	1.67959	1.67959	1.67959	1.67959	1.67959	8.06864	1.67959	1.67959	7.172	1.67959	chr2	58312015	58313561	+		novel	NM_006296	VRK2	exonic	158
chr6:131520601-131540948+	-5.68275	6.04889	4.99825	0.025373	0.432824	down	0	0	0	0	0	12	0	38	0	0	1.67959	1.67959	1.67959	1.67959	1.67959	6.97311	1.67959	8.13231	1.67959	1.67959	chr6	131520600	131540948	+		PMID:25070500	NM_016377	AKAP7	exonic	261
chr4:140864692-140864968-	-5.68089	6.04202	4.96313	0.0258932	0.432824	down	0	0	0	0	0	0	0	0	9	17	1.67959	1.67959	1.67959	1.67959	1.67959	1.67959	1.67959	1.67959	7.52743	7.82742	chr4	140864691	140864968	-		novel	ENST00000502696	MAML3	intronic	277
chr7:102038067-102047945+	-5.67073	6.04	4.95418	0.0260276	0.432824	down	0	0	0	0	0	39	0	0	0	0	1.67959	1.67959	1.67959	1.67959	1.67959	8.64785	1.67959	1.67959	1.67959	1.67959	chr7	102038066	102047945	+	hsa_circ_0132821	circBase	NM_024653	PRKRIP1	exonic	331
chr1:176085760-176118210-	-5.67073	6.04	4.95418	0.0260276	0.432824	down	0	0	0	0	0	39	0	0	0	0	1.67959	1.67959	1.67959	1.67959	1.67959	8.64785	1.67959	1.67959	1.67959	1.67959	chr1	176085759	176118210	-	hsa_circ_0015374	circBase	NM_022457	RFWD2	exonic	264
chr20:34435272-34446303+	-5.66501	6.03854	4.94743	0.0261295	0.432824	down	0	0	0	0	0	0	0	54	0	0	1.67959	1.67959	1.67959	1.67959	1.67959	1.67959	1.67959	8.63438	1.67959	1.67959	chr20	34435271	34446303	+	hsa_circ_0060152	circBase	NM_016436	PHF20	exonic	165
chr18:39535222-39600669+	-5.66279	6.0279	4.89334	0.0269605	0.432824	down	0	0	0	0	0	0	0	0	20	0	1.67959	1.67959	1.67959	1.67959	1.67959	1.67959	1.67959	1.67959	8.66559	1.67959	chr18	39535221	39600669	+		novel	NM_002647	PIK3C3	sense overlapping	65448
chr19:58287911-58301768+	-5.66279	6.0279	4.89334	0.0269605	0.432824	down	0	0	0	0	0	0	0	0	20	0	1.67959	1.67959	1.67959	1.67959	1.67959	1.67959	1.67959	1.67959	8.66559	1.67959	chr19	58287910	58301768	+		novel	ENST00000599802	ZNF586	intronic	13858
chr8:17106661-17159932+	-5.66279	6.0279	4.89334	0.0269605	0.432824	down	0	0	0	0	0	0	0	0	20	0	1.67959	1.67959	1.67959	1.67959	1.67959	1.67959	1.67959	1.67959	8.66559	1.67959	chr8	17106660	17159932	+		novel	NM_152415	VPS37A	sense overlapping	53272
chr13:33222891-33250096+	-5.66279	6.0279	4.89334	0.0269605	0.432824	down	0	0	0	0	0	0	0	0	20	0	1.67959	1.67959	1.67959	1.67959	1.67959	1.67959	1.67959	1.67959	8.66559	1.67959	chr13	33222890	33250096	+	hsa_circ_0100278	circBase	NM_015032	PDS5B	exonic	981
chr11:134076494-134080348-	-5.66279	6.0279	4.89334	0.0269605	0.432824	down	0	0	0	0	0	0	0	0	20	0	1.67959	1.67959	1.67959	1.67959	1.67959	1.67959	1.67959	1.67959	8.66559	1.67959	chr11	134076493	134080348	-	hsa_circ_0024920	circBase	NM_015261	NCAPD3	exonic	634
chr20:39726871-39729884+	-5.66279	6.0279	4.89334	0.0269605	0.432824	down	0	0	0	0	0	0	0	0	20	0	1.67959	1.67959	1.67959	1.67959	1.67959	1.67959	1.67959	1.67959	8.66559	1.67959	chr20	39726870	39729884	+		novel	NM_003286	TOP1	sense overlapping	3014
chr4:185552919-185559622-	-5.65814	6.02785	4.89364	0.0269557	0.432824	down	0	0	0	0	0	0	0	16	14	0	1.67959	1.67959	1.67959	1.67959	1.67959	1.67959	1.67959	6.90685	8.15589	1.67959	chr4	185552918	185559622	-		novel	NM_004346	CASP3	exonic	498
chr21:46631332-46631854+	-5.65331	6.02707	4.89022	0.0270093	0.432824	down	0	0	0	0	0	0	0	0	0	30	1.67959	1.67959	1.67959	1.67959	1.67959	1.67959	1.67959	1.67959	1.67959	8.638	chr21	46631331	46631854	+		novel	ENST00000360697	ADARB1	intronic	523
chr5:14270934-14280545+	-5.65331	6.02707	4.89022	0.0270093	0.432824	down	0	0	0	0	0	0	0	0	0	30	1.67959	1.67959	1.67959	1.67959	1.67959	1.67959	1.67959	1.67959	1.67959	8.638	chr5	14270933	14280545	+	hsa_circ_0003037	circBase	NM_007118	TRIO	exonic	190
chr16:15785001-15790717+	-5.65331	6.02707	4.89022	0.0270093	0.432824	down	0	0	0	0	0	0	0	0	0	30	1.67959	1.67959	1.67959	1.67959	1.67959	1.67959	1.67959	1.67959	1.67959	8.638	chr16	15785000	15790717	+	hsa_circ_0038062	circBase	NM_017668	NDE1	exonic	424
chr16:71799392-71803602-	-5.6529	6.02722	4.89099	0.0269972	0.432824	down	0	0	0	0	0	0	0	8	1	24	1.67959	1.67959	1.67959	1.67959	1.67959	1.67959	1.67959	5.94486	4.54515	8.31897	chr16	71799391	71803602	-	hsa_circ_0007770	circBase	NM_001128	AP1G1	exonic	173
chr2:85190039-85190246-	-5.63866	6.01306	4.82063	0.028121	0.432824	down	0	0	0	0	0	0	0	0	19	1	1.67959	1.67959	1.67959	1.67959	1.67959	1.67959	1.67959	1.67959	8.59219	4.03351	chr2	85190038	85190246	-		novel	T192874	G044455	intronic	208
chr11:120310838-120316173+	-5.63773	6.01927	4.85217	0.0276113	0.432824	down	0	0	0	0	0	0	8	25	0	7	1.67959	1.67959	1.67959	1.67959	1.67959	1.67959	6.8778	7.53678	1.67959	6.57609	chr11	120310837	120316173	+	hsa_circ_0024626	circBase	NM_015313	ARHGEF12	exonic	346
chr3:133327379-133336170-	-5.63403	6.01736	4.84284	0.0277612	0.432824	down	0	0	0	0	0	38	0	0	0	0	1.67959	1.67959	1.67959	1.67959	1.67959	8.61068	1.67959	1.67959	1.67959	1.67959	chr3	133327378	133336170	-	hsa_circ_0121975	circBase	NM_007027	TOPBP1	exonic	833
chr2:232324863-232325577-	-5.63403	6.01736	4.84284	0.0277612	0.432824	down	0	0	0	0	0	38	0	0	0	0	1.67959	1.67959	1.67959	1.67959	1.67959	8.61068	1.67959	1.67959	1.67959	1.67959	chr2	232324862	232325577	-		novel	NM_005381	NCL	exonic	427
chr6:147636651-147646220+	-5.62751	6.01427	4.82773	0.0280055	0.432824	down	0	0	0	0	0	22	0	22	0	0	1.67959	1.67959	1.67959	1.67959	1.67959	7.83076	1.67959	7.35574	1.67959	1.67959	chr6	147636650	147646220	+	hsa_circ_0130967	circBase	NM_139244	STXBP5	exonic	526
chr6:149833291-149846345-	-5.61755	6.00421	4.77777	0.0288295	0.432824	down	0	0	0	0	0	0	27	0	0	0	1.67959	1.67959	1.67959	1.67959	1.67959	1.67959	8.60476	1.67959	1.67959	1.67959	chr6	149833290	149846345	-		novel	NM_139126	PPIL4	exonic	424
chr13:95686859-95727805-	-5.61755	6.00421	4.77777	0.0288295	0.432824	down	0	0	0	0	0	0	27	0	0	0	1.67959	1.67959	1.67959	1.67959	1.67959	1.67959	8.60476	1.67959	1.67959	1.67959	chr13	95686858	95727805	-		novel	NM_005845	ABCC4	exonic	1184
chr1:35470733-35474525-	-5.61755	6.00421	4.77777	0.0288295	0.432824	down	0	0	0	0	0	0	27	0	0	0	1.67959	1.67959	1.67959	1.67959	1.67959	1.67959	8.60476	1.67959	1.67959	1.67959	chr1	35470732	35474525	-	hsa_circ_0113132	circBase	NM_007167	ZMYM6	exonic	462
chr9:15187969-15189631-	-5.61755	6.00421	4.77777	0.0288295	0.432824	down	0	0	0	0	0	0	27	0	0	0	1.67959	1.67959	1.67959	1.67959	1.67959	1.67959	8.60476	1.67959	1.67959	1.67959	chr9	15187968	15189631	-		novel	NM_152574	TTC39B	exonic	222
chr8:48206456-48206619+	-5.61301	6.00458	4.77995	0.028793	0.432824	down	0	0	0	0	0	36	0	2	0	0	1.67959	1.67959	1.67959	1.67959	1.67959	8.53333	1.67959	4.15401	1.67959	1.67959	chr8	48206455	48206619	+	hsa_circ_0084194	circBase	NR_104581	SPIDR	exonic	164
chr3:107429299-107447807+	-5.61174	6.0059	4.78665	0.0286811	0.432824	down	0	0	0	0	0	0	0	52	0	0	1.67959	1.67959	1.67959	1.67959	1.67959	1.67959	1.67959	8.58038	1.67959	1.67959	chr3	107429298	107447807	+	hsa_circ_0121411	circBase	NM_020235	BBX	exonic	610
chr19:17294638-17302028+	-5.61174	6.0059	4.78665	0.0286811	0.432824	down	0	0	0	0	0	0	0	52	0	0	1.67959	1.67959	1.67959	1.67959	1.67959	1.67959	1.67959	8.58038	1.67959	1.67959	chr19	17294637	17302028	+		novel	NM_004145	MYO9B	exonic	478
chr19:47998807-48006759-	-5.61174	6.0059	4.78665	0.0286811	0.432824	down	0	0	0	0	0	0	0	52	0	0	1.67959	1.67959	1.67959	1.67959	1.67959	1.67959	1.67959	8.58038	1.67959	1.67959	chr19	47998806	48006759	-		novel	NM_003827	NAPA	exonic	244
chr1:21205775-21212864-	-5.60944	6.00164	4.76539	0.0290375	0.432824	down	0	0	0	0	0	0	0	18	0	19	1.67959	1.67959	1.67959	1.67959	1.67959	1.67959	1.67959	7.07249	1.67959	7.98574	chr1	21205774	21212864	-	hsa_circ_0111870	circBase	NM_003760	EIF4G3	sense overlapping	7090
chr17:60650576-60651771+	-5.60834	6.00052	4.75983	0.0291314	0.432824	down	0	0	0	0	0	0	17	19	0	0	1.67959	1.67959	1.67959	1.67959	1.67959	1.67959	7.9443	7.14869	1.67959	1.67959	chr17	60650575	60651771	+		novel	NM_001284333	TLK2	exonic	219
chr12:65700643-65702435+	-5.60538	5.99761	4.74541	0.0293766	0.432824	down	0	0	0	0	0	0	0	0	0	29	1.67959	1.67959	1.67959	1.67959	1.67959	1.67959	1.67959	1.67959	1.67959	8.58949	chr12	65700642	65702435	+		novel	NM_001193460	MSRB3	exonic	291
chr14:35272060-35280242-	-5.60538	5.99761	4.74541	0.0293766	0.432824	down	0	0	0	0	0	0	0	0	0	29	1.67959	1.67959	1.67959	1.67959	1.67959	1.67959	1.67959	1.67959	1.67959	8.58949	chr14	35272059	35280242	-		novel	NM_013448	BAZ1A	exonic	325
chr17:60598134-60642498+	-5.59636	5.99436	4.72964	0.0296472	0.432824	down	0	0	0	0	0	37	0	0	0	0	1.67959	1.67959	1.67959	1.67959	1.67959	8.57253	1.67959	1.67959	1.67959	1.67959	chr17	60598133	60642498	+		novel	NM_006852	TLK2	exonic	887
chr10:112704001-112745523+	-5.59636	5.99436	4.72964	0.0296472	0.432824	down	0	0	0	0	0	37	0	0	0	0	1.67959	1.67959	1.67959	1.67959	1.67959	8.57253	1.67959	1.67959	1.67959	1.67959	chr10	112704000	112745523	+		novel	ENST00000489390	SHOC2	intronic	41523
chr21:17181128-17203948+	-5.59636	5.99436	4.72964	0.0296472	0.432824	down	0	0	0	0	0	37	0	0	0	0	1.67959	1.67959	1.67959	1.67959	1.67959	8.57253	1.67959	1.67959	1.67959	1.67959	chr21	17181127	17203948	+	hsa_circ_0061294	circBase	NM_013396	USP25	exonic	1213
chr18:20555116-20564953+	-5.59167	5.99169	4.71649	0.0298747	0.432824	down	0	0	0	0	0	34	0	4	0	0	1.67959	1.67959	1.67959	1.67959	1.67959	8.45161	1.67959	5.018	1.67959	1.67959	chr18	20555115	20564953	+	hsa_circ_0047133	circBase	NM_002894	RBBP8	exonic	348
chr7:100061217-100061652-	-5.59017	5.98298	4.67316	0.0306375	0.432824	down	0	0	0	0	0	0	0	0	19	0	1.67959	1.67959	1.67959	1.67959	1.67959	1.67959	1.67959	1.67959	8.59219	1.67959	chr7	100061216	100061652	-		novel	NM_001004323	C7orf61	sense overlapping	436
chr4:110862102-110904697+	-5.59017	5.98298	4.67316	0.0306375	0.432824	down	0	0	0	0	0	0	0	0	19	0	1.67959	1.67959	1.67959	1.67959	1.67959	1.67959	1.67959	1.67959	8.59219	1.67959	chr4	110862101	110904697	+		novel	NM_001963	EGF	exonic	2364
chr10:34834129-34875087-	-5.59017	5.98298	4.67316	0.0306375	0.432824	down	0	0	0	0	0	0	0	0	19	0	1.67959	1.67959	1.67959	1.67959	1.67959	1.67959	1.67959	1.67959	8.59219	1.67959	chr10	34834128	34875087	-		novel	uc001ixt.1	PARD3	intronic	40959
chr4:76573823-76580430-	-5.59017	5.98298	4.67316	0.0306375	0.432824	down	0	0	0	0	0	0	0	0	19	0	1.67959	1.67959	1.67959	1.67959	1.67959	1.67959	1.67959	1.67959	8.59219	1.67959	chr4	76573822	76580430	-		novel	NM_012297	G3BP2	exonic	383
chr12:14591064-14619524+	-5.59017	5.98298	4.67316	0.0306375	0.432824	down	0	0	0	0	0	0	0	0	19	0	1.67959	1.67959	1.67959	1.67959	1.67959	1.67959	1.67959	1.67959	8.59219	1.67959	chr12	14591063	14619524	+		novel	NM_018179	ATF7IP	exonic	1071
chr13:77798586-77818086-	-5.59017	5.98298	4.67316	0.0306375	0.432824	down	0	0	0	0	0	0	0	0	19	0	1.67959	1.67959	1.67959	1.67959	1.67959	1.67959	1.67959	1.67959	8.59219	1.67959	chr13	77798585	77818086	-	hsa_circ_0100910	circBase	NM_015057	MYCBP2	exonic	558
chr8:94721999-94731016+	-5.58605	5.98661	4.69137	0.0303145	0.432824	down	0	0	0	0	0	8	16	9	0	0	1.67959	1.67959	1.67959	1.67959	1.67959	6.40642	7.85801	6.10643	1.67959	1.67959	chr8	94721998	94731016	+	hsa_circ_0137326	circBase	ENST00000359421	FAM92A1	exonic	219
chr9:17235656-17236586+	-5.58405	5.98693	4.69305	0.0302848	0.432824	down	0	0	0	0	0	0	0	26	0	14	1.67959	1.67959	1.67959	1.67959	1.67959	1.67959	1.67959	7.5924	1.67959	7.55166	chr9	17235655	17236586	+	hsa_circ_0138340	circBase	NM_017738	CNTLN	exonic	315
chr21:46558213-46564616+	-5.57669	5.97959	4.65675	0.0309317	0.432824	down	0	0	0	0	0	0	17	0	0	10	1.67959	1.67959	1.67959	1.67959	1.67959	1.67959	7.9443	1.67959	1.67959	7.07606	chr21	46558212	46564616	+		novel	ENST00000449478	ADARB1	intronic	6404
chr6:33232623-33234489-	-5.56559	5.97509	4.63472	0.0313313	0.432824	down	0	0	0	0	0	27	2	0	0	5	1.67959	1.67959	1.67959	1.67959	1.67959	8.12245	4.99112	1.67959	1.67959	6.10991	chr6	33232622	33234489	-		novel	NM_022553	VPS52	sense overlapping	1867
chr3:155608457-155633868+	-5.56422	5.97172	4.61807	0.0316369	0.432824	down	0	0	0	0	0	0	26	0	0	0	1.67959	1.67959	1.67959	1.67959	1.67959	1.67959	8.55077	1.67959	1.67959	1.67959	chr3	155608456	155633868	+		novel	NM_003875	GMPS	sense overlapping	25412
chr2:159851414-159857701+	-5.56422	5.97172	4.61807	0.0316369	0.432824	down	0	0	0	0	0	0	26	0	0	0	1.67959	1.67959	1.67959	1.67959	1.67959	1.67959	8.55077	1.67959	1.67959	1.67959	chr2	159851413	159857701	+	hsa_circ_0006445	circBase	NM_033394	TANC1	sense overlapping	6288
chr22:43222946-43231499-	-5.56422	5.97172	4.61807	0.0316369	0.432824	down	0	0	0	0	0	0	26	0	0	0	1.67959	1.67959	1.67959	1.67959	1.67959	1.67959	8.55077	1.67959	1.67959	1.67959	chr22	43222945	43231499	-	hsa_circ_0005679	circBase	NM_014570	ARFGAP3	exonic	364
chr3:15793257-15836813-	-5.56422	5.97172	4.61807	0.0316369	0.432824	down	0	0	0	0	0	0	26	0	0	0	1.67959	1.67959	1.67959	1.67959	1.67959	1.67959	8.55077	1.67959	1.67959	1.67959	chr3	15793256	15836813	-	hsa_circ_0064519	circBase	NM_015199	ANKRD28	exonic	234
chr1:29319842-29344954+	-5.56422	5.97172	4.61807	0.0316369	0.432824	down	0	0	0	0	0	0	26	0	0	0	1.67959	1.67959	1.67959	1.67959	1.67959	1.67959	8.55077	1.67959	1.67959	1.67959	chr1	29319841	29344954	+	hsa_circ_0000041	circBase	NM_004437	EPB41	exonic	656	Alzheimer's disease, bladder cancer, cardiac hypertrophy, epithelial ovarian cancer (EOC), hepatocellular carcinoma (HCC), malignant melanoma, pituitary adenoma, prostate cancer, schizophrenia
chr2:61304055-61315603+	-5.55769	5.97099	4.61452	0.0317023	0.432824	down	0	0	0	0	0	36	0	0	0	0	1.67959	1.67959	1.67959	1.67959	1.67959	8.53333	1.67959	1.67959	1.67959	1.67959	chr2	61304054	61315603	+	hsa_circ_0120534	circBase	NM_032506	KIAA1841	exonic	657
chr7:139425820-139462488-	-5.55769	5.97099	4.61452	0.0317023	0.432824	down	0	0	0	0	0	36	0	0	0	0	1.67959	1.67959	1.67959	1.67959	1.67959	8.53333	1.67959	1.67959	1.67959	1.67959	chr7	139425819	139462488	-		novel	NM_001113239	HIPK2	intronic	36669
chr8:62563609-62566219-	-5.55769	5.97099	4.61452	0.0317023	0.432824	down	0	0	0	0	0	36	0	0	0	0	1.67959	1.67959	1.67959	1.67959	1.67959	8.53333	1.67959	1.67959	1.67959	1.67959	chr8	62563608	62566219	-		novel	NM_004318	ASPH	exonic	168
chr8:109482055-109498828+	-5.55769	5.97099	4.61452	0.0317023	0.432824	down	0	0	0	0	0	36	0	0	0	0	1.67959	1.67959	1.67959	1.67959	1.67959	8.53333	1.67959	1.67959	1.67959	1.67959	chr8	109482054	109498828	+		novel	NM_014673	EMC2	sense overlapping	16774
chr19:47653459-47656297+	-5.55641	5.97249	4.62196	0.0315651	0.432824	down	0	0	0	0	0	0	0	50	0	0	1.67959	1.67959	1.67959	1.67959	1.67959	1.67959	1.67959	8.52428	1.67959	1.67959	chr19	47653458	47656297	+	hsa_circ_0007219	circBase	NM_005500	SAE1	exonic	317
chr12:30816423-30843511-	-5.55581	5.96753	4.59747	0.0320192	0.432824	down	0	0	0	0	0	0	0	0	0	28	1.67959	1.67959	1.67959	1.67959	1.67959	1.67959	1.67959	1.67959	1.67959	8.5393	chr12	30816422	30843511	-	hsa_circ_0025776	circBase	NM_006390	IPO8	exonic	1510
chr7:74491493-74496544+	-5.55581	5.96753	4.59747	0.0320192	0.432824	down	0	0	0	0	0	0	0	0	0	28	1.67959	1.67959	1.67959	1.67959	1.67959	1.67959	1.67959	1.67959	1.67959	8.5393	chr7	74491492	74496544	+		novel	T326619	G076545	sense overlapping	5052
chr14:65922339-65927869+	-5.55581	5.96753	4.59747	0.0320192	0.432824	down	0	0	0	0	0	0	0	0	0	28	1.67959	1.67959	1.67959	1.67959	1.67959	1.67959	1.67959	1.67959	1.67959	8.5393	chr14	65922338	65927869	+	hsa_circ_0102428	circBase	NM_178156	FUT8	intronic	5531
chr7:105205724-105206095+	-5.54911	5.96559	4.58794	0.0321976	0.432824	down	0	0	0	0	0	33	2	0	0	0	1.67959	1.67959	1.67959	1.67959	1.67959	8.40894	4.99112	1.67959	1.67959	1.67959	chr7	105205723	105206095	+	hsa_circ_0081863	circBase	NM_021930	RINT1	exonic	300
chr5:72850147-72857113-	-5.54257	5.95422	4.53205	0.0332658	0.432824	down	0	0	0	0	0	0	0	1	18	0	1.67959	1.67959	1.67959	1.67959	1.67959	1.67959	1.67959	3.39273	8.51485	1.67959	chr5	72850146	72857113	-	hsa_circ_0129585	circBase	NM_023039	ANKRA2	exonic	516
chr11:11941889-11942041+	-5.5218	5.94698	4.49635	0.0339672	0.432824	down	0	0	0	0	0	0	4	0	0	23	1.67959	1.67959	1.67959	1.67959	1.67959	1.67959	5.91657	1.67959	1.67959	8.2582	chr11	11941888	11942041	+	hsa_circ_0095164	circBase	NM_017944	USP47	exonic	153
chr3:5212188-5214425+	-5.52043	5.94293	4.47655	0.034363	0.432824	down	0	0	0	0	0	4	7	0	11	0	1.67959	1.67959	1.67959	1.67959	1.67959	5.4599	6.69075	1.67959	7.81238	1.67959	chr3	5212187	5214425	+	hsa_circ_0003229	circBase	NM_018184	ARL8B	exonic	249
chr1:42948334-42964587+	-5.51945	5.94766	4.4996	0.0339028	0.432824	down	0	0	0	0	0	0	1	20	0	15	1.67959	1.67959	1.67959	1.67959	1.67959	1.67959	4.12957	7.22106	1.67959	7.64956	chr1	42948333	42964587	+	hsa_circ_0113389	circBase	ENST00000428554	CCDC30	exonic	441
chr11:65267881-65268263+	-5.51794	5.94722	4.49744	0.0339457	0.432824	down	0	0	0	0	0	35	0	0	0	0	1.67959	1.67959	1.67959	1.67959	1.67959	8.49305	1.67959	1.67959	1.67959	1.67959	chr11	65267880	65268263	+		novel	GSE61474_TCONS_00050957	GSE61474_XLOC_010031	intronic	383
chr20:10536879-10541468-	-5.51794	5.94722	4.49744	0.0339457	0.432824	down	0	0	0	0	0	35	0	0	0	0	1.67959	1.67959	1.67959	1.67959	1.67959	8.49305	1.67959	1.67959	1.67959	1.67959	chr20	10536878	10541468	-		novel	NM_001009608	SLX4IP	antisense	4590
chr14:92126181-92195823-	-5.51794	5.94722	4.49744	0.0339457	0.432824	down	0	0	0	0	0	35	0	0	0	0	1.67959	1.67959	1.67959	1.67959	1.67959	8.49305	1.67959	1.67959	1.67959	1.67959	chr14	92126180	92195823	-		novel	NM_024764	CATSPERB	exonic	1432
chr3:37132958-37138151-	-5.51794	5.94722	4.49744	0.0339457	0.432824	down	0	0	0	0	0	35	0	0	0	0	1.67959	1.67959	1.67959	1.67959	1.67959	8.49305	1.67959	1.67959	1.67959	1.67959	chr3	37132957	37138151	-		novel	NM_006309	LRRFIP2	exonic	234
chr1:246921528-246927659+	-5.51794	5.94722	4.49744	0.0339457	0.432824	down	0	0	0	0	0	35	0	0	0	0	1.67959	1.67959	1.67959	1.67959	1.67959	8.49305	1.67959	1.67959	1.67959	1.67959	chr1	246921527	246927659	+		novel	NM_016002	SCCPDH	exonic	538
chrY:2821950-2825123+	-5.51375	5.93664	4.44579	0.0349874	0.432824	down	0	0	0	0	0	0	0	0	18	0	1.67959	1.67959	1.67959	1.67959	1.67959	1.67959	1.67959	1.67959	8.51485	1.67959	chrY	2821949	2825123	+		novel	NM_001145275	ZFY	intronic	3174
chr11:10794674-10797180+	-5.51375	5.93664	4.44579	0.0349874	0.432824	down	0	0	0	0	0	0	0	0	18	0	1.67959	1.67959	1.67959	1.67959	1.67959	1.67959	1.67959	1.67959	8.51485	1.67959	chr11	10794673	10797180	+		novel	NM_014633	CTR9	exonic	515
chr4:54306749-54319300+	-5.51375	5.93664	4.44579	0.0349874	0.432824	down	0	0	0	0	0	0	0	0	18	0	1.67959	1.67959	1.67959	1.67959	1.67959	1.67959	1.67959	1.67959	8.51485	1.67959	chr4	54306748	54319300	+		novel	NM_001134937	FIP1L1	exonic	352
chr10:71255350-71265996+	-5.51375	5.93664	4.44579	0.0349874	0.432824	down	0	0	0	0	0	0	0	0	18	0	1.67959	1.67959	1.67959	1.67959	1.67959	1.67959	1.67959	1.67959	8.51485	1.67959	chr10	71255349	71265996	+		novel	NM_012339	TSPAN15	exonic	378
chr14:92053546-92126325-	-5.51375	5.93664	4.44579	0.0349874	0.432824	down	0	0	0	0	0	0	0	0	18	0	1.67959	1.67959	1.67959	1.67959	1.67959	1.67959	1.67959	1.67959	8.51485	1.67959	chr14	92053545	92126325	-		novel	NM_024764	CATSPERB	exonic	1845
chr14:50287061-50300214-	-5.51375	5.93664	4.44579	0.0349874	0.432824	down	0	0	0	0	0	0	0	0	18	0	1.67959	1.67959	1.67959	1.67959	1.67959	1.67959	1.67959	1.67959	8.51485	1.67959	chr14	50287060	50300214	-		novel	uc001wxd.1	NEMF	sense overlapping	13154
chr12:69644909-69646934+	-5.51375	5.93664	4.44579	0.0349874	0.432824	down	0	0	0	0	0	0	0	0	18	0	1.67959	1.67959	1.67959	1.67959	1.67959	1.67959	1.67959	1.67959	8.51485	1.67959	chr12	69644908	69646934	+	hsa_circ_0027499	circBase	NM_007007	CPSF6	exonic	314
chr22:32272143-32275738+	-5.51375	5.93664	4.44579	0.0349874	0.432824	down	0	0	0	0	0	0	0	0	18	0	1.67959	1.67959	1.67959	1.67959	1.67959	1.67959	1.67959	1.67959	8.51485	1.67959	chr22	32272142	32275738	+	hsa_circ_0062965	circBase	NM_014662	DEPDC5	exonic	337
chr21:30532301-30547075+	-5.50884	5.93849	4.45458	0.0348078	0.432824	down	0	0	0	0	0	0	25	0	0	0	1.67959	1.67959	1.67959	1.67959	1.67959	1.67959	8.49468	1.67959	1.67959	1.67959	chr21	30532300	30547075	+		novel	NM_020152	MAP3K7CL	sense overlapping	14775
chr8:28950262-28967587-	-5.50884	5.93849	4.45458	0.0348078	0.432824	down	0	0	0	0	0	0	25	0	0	0	1.67959	1.67959	1.67959	1.67959	1.67959	1.67959	8.49468	1.67959	1.67959	1.67959	chr8	28950261	28967587	-		novel	NM_015254	KIF13B	exonic	528
chr4:119059209-119064839+	-5.50448	5.93681	4.44628	0.0349773	0.432824	down	0	0	0	0	0	0	0	0	0	27	1.67959	1.67959	1.67959	1.67959	1.67959	1.67959	1.67959	1.67959	1.67959	8.48729	chr4	119059208	119064839	+	hsa_circ_0125154	circBase	NM_004784	NDST3	exonic	315
chr11:122563985-122580182+	-5.50012	5.93382	4.43157	0.0352801	0.432824	down	0	0	0	0	0	0	11	0	0	15	1.67959	1.67959	1.67959	1.67959	1.67959	1.67959	7.32647	1.67959	1.67959	7.64956	chr11	122563984	122580182	+		novel	NM_032873	UBASH3B	intronic	16198
chr6:90039502-90053475-	-5.49885	5.93827	4.45319	0.0348361	0.432824	down	0	0	0	0	0	0	0	48	0	0	1.67959	1.67959	1.67959	1.67959	1.67959	1.67959	1.67959	8.46591	1.67959	1.67959	chr6	90039501	90053475	-	hsa_circ_0132626	circBase	NM_016021	UBE2J1	sense overlapping	13974
chr18:55398859-55399061-	-5.49841	5.93444	4.4345	0.0352195	0.432824	down	0	0	0	0	0	22	9	0	0	0	1.67959	1.67959	1.67959	1.67959	1.67959	7.83076	7.04335	1.67959	1.67959	1.67959	chr18	55398858	55399061	-	hsa_circ_0008105	circBase	NM_005603	ATP8B1	exonic	203
chr5:74639678-74641483+	-5.49318	5.93242	4.42449	0.0354268	0.432824	down	0	0	0	0	0	33	1	0	0	0	1.67959	1.67959	1.67959	1.67959	1.67959	8.40894	4.12957	1.67959	1.67959	1.67959	chr5	74639677	74641483	+	hsa_circ_0073036	circBase	NM_000859	HMGCR	exonic	285
chr9:129154345-129184227+	-5.49294	5.92785	4.40233	0.0358899	0.432824	down	0	0	0	0	0	15	0	0	10	0	1.67959	1.67959	1.67959	1.67959	1.67959	7.28766	1.67959	1.67959	7.67693	1.67959	chr9	129154344	129184227	+	hsa_circ_0088614	circBase	NM_033446	MVB12B	exonic	348
chr2:32897339-32927987+	-5.48101	5.9181	4.35466	0.0369079	0.432824	down	0	0	0	0	0	0	5	0	14	0	1.67959	1.67959	1.67959	1.67959	1.67959	1.67959	6.22311	1.67959	8.15589	1.67959	chr2	32897338	32927987	+		novel	NM_017735	TTC27	exonic	294
chr1:212529968-212530626+	-5.47833	5.91767	4.35243	0.0369561	0.432824	down	0	0	0	0	0	6	1	2	13	0	1.67959	1.67959	1.67959	1.67959	1.67959	6.00943	4.12957	4.15401	8.05022	1.67959	chr1	212529967	212530626	+	hsa_circ_0111894	circBase	NM_006243	PPP2R5A	exonic	299
chr6:81964779-81964941+	-5.47706	5.92306	4.37833	0.0363987	0.432824	down	0	0	0	0	0	34	0	0	0	0	1.67959	1.67959	1.67959	1.67959	1.67959	8.45161	1.67959	1.67959	1.67959	1.67959	chr6	81964778	81964941	+		novel	T307170	G071806	antisense	163
chr15:57564472-57574796+	-5.47706	5.92306	4.37833	0.0363987	0.432824	down	0	0	0	0	0	34	0	0	0	0	1.67959	1.67959	1.67959	1.67959	1.67959	8.45161	1.67959	1.67959	1.67959	1.67959	chr15	57564471	57574796	+		novel	NM_003205	TCF12	sense overlapping	10325
chr16:31388321-31388586+	-5.47706	5.92306	4.37833	0.0363987	0.432824	down	0	0	0	0	0	34	0	0	0	0	1.67959	1.67959	1.67959	1.67959	1.67959	8.45161	1.67959	1.67959	1.67959	1.67959	chr16	31388320	31388586	+		novel	NM_000887	ITGAX	exonic	164
chr6:144612873-144613043+	-5.47706	5.92306	4.37833	0.0363987	0.432824	down	0	0	0	0	0	34	0	0	0	0	1.67959	1.67959	1.67959	1.67959	1.67959	8.45161	1.67959	1.67959	1.67959	1.67959	chr6	144612872	144613043	+		novel	NM_007124	UTRN	exonic	171
chr20:9343543-9353050+	-5.47706	5.92306	4.37833	0.0363987	0.432824	down	0	0	0	0	0	34	0	0	0	0	1.67959	1.67959	1.67959	1.67959	1.67959	8.45161	1.67959	1.67959	1.67959	1.67959	chr20	9343542	9353050	+		novel	NM_000933	PLCB4	exonic	317
chr14:66188493-66210193-	-5.47706	5.92306	4.37833	0.0363987	0.432824	down	0	0	0	0	0	34	0	0	0	0	1.67959	1.67959	1.67959	1.67959	1.67959	8.45161	1.67959	1.67959	1.67959	1.67959	chr14	66188492	66210193	-		novel	T106050	G025052	sense overlapping	21701
chr7:74119496-74125440+	-5.47706	5.92306	4.37833	0.0363987	0.432824	down	0	0	0	0	0	34	0	0	0	0	1.67959	1.67959	1.67959	1.67959	1.67959	8.45161	1.67959	1.67959	1.67959	1.67959	chr7	74119495	74125440	+	hsa_circ_0134638	circBase	NM_001518	GTF2I	exonic	177
chr6:111208708-111214865+	-5.47655	5.92211	4.37372	0.0364973	0.432824	down	0	0	0	0	0	25	0	0	0	7	1.67959	1.67959	1.67959	1.67959	1.67959	8.01274	1.67959	1.67959	1.67959	6.57609	chr6	111208707	111214865	+	hsa_circ_0130333	circBase	NM_001634	AMD1	sense overlapping	6158
chr2:55473473-55476670-	-5.47524	5.92156	4.37102	0.0365552	0.432824	down	0	0	0	0	0	0	12	24	0	0	1.67959	1.67959	1.67959	1.67959	1.67959	1.67959	7.4496	7.47892	1.67959	1.67959	chr2	55473472	55476670	-		PMID:25242744	NM_002453	MTIF2	exonic	265
chr18:10539759-10540396+	-5.47298	5.91976	4.36216	0.0367457	0.432824	down	0	0	0	0	0	0	0	15	0	18	1.67959	1.67959	1.67959	1.67959	1.67959	1.67959	1.67959	6.81631	1.67959	7.90875	chr18	10539758	10540396	+	hsa_circ_0107863	circBase	NM_003826	NAPG	exonic	248
chr10:46233431-46240330+	-5.46918	5.92085	4.36721	0.0366369	0.432824	down	0	0	0	0	0	0	0	47	0	0	1.67959	1.67959	1.67959	1.67959	1.67959	1.67959	1.67959	8.43581	1.67959	1.67959	chr10	46233430	46240330	+		novel	NM_015262	FAM21C	exonic	393
chr20:58755257-58755971+	-5.45869	5.90502	4.29035	0.0383294	0.432824	down	0	0	0	0	0	0	0	0	14	5	1.67959	1.67959	1.67959	1.67959	1.67959	1.67959	1.67959	1.67959	8.15589	6.10991	chr20	58755256	58755971	+		novel	ENST00000431181	RP5-1043L13.1	intronic	715
chr6:74190398-74191967+	-5.45471	6.93486	7.10843	0.00767225	0.432824	down	1	0	0	0	0	16	17	42	0	18	4.05022	1.67959	1.67959	1.67959	1.67959	7.37892	7.9443	8.27513	1.67959	7.90875	chr6	74190397	74191967	+	hsa_circ_0004973	circBase	NM_012123	MTO1	exonic	336
chr9:20819795-20867011+	-5.45354	5.90774	4.30302	0.0380449	0.432824	down	0	0	0	0	0	0	0	9	0	21	1.67959	1.67959	1.67959	1.67959	1.67959	1.67959	1.67959	6.10643	1.67959	8.12839	chr9	20819794	20867011	+	hsa_circ_0138470	circBase	ENST00000338382	FOCAD	exonic	735
chr7:124510965-124522520-	-5.45126	5.90447	4.28715	0.0384014	0.432824	down	0	0	0	0	0	0	24	0	0	0	1.67959	1.67959	1.67959	1.67959	1.67959	1.67959	8.43632	1.67959	1.67959	1.67959	chr7	124510964	124522520	-		novel	ENST00000429326	POT1	intronic	11556
chr16:81385188-81411307+	-5.45126	5.90447	4.28715	0.0384014	0.432824	down	0	0	0	0	0	0	24	0	0	0	1.67959	1.67959	1.67959	1.67959	1.67959	1.67959	8.43632	1.67959	1.67959	1.67959	chr16	81385187	81411307	+	hsa_circ_0003857	circBase	NM_022041	GAN	sense overlapping	26120
chr9:134064440-134067679+	-5.45126	5.90447	4.28715	0.0384014	0.432824	down	0	0	0	0	0	0	24	0	0	0	1.67959	1.67959	1.67959	1.67959	1.67959	1.67959	8.43632	1.67959	1.67959	1.67959	chr9	134064439	134067679	+	hsa_circ_0138161	circBase	NM_005085	NUP214	exonic	164
chr2:20454624-20460227-	-5.45125	5.90542	4.29173	0.0382982	0.432824	down	0	0	0	0	0	0	0	0	0	26	1.67959	1.67959	1.67959	1.67959	1.67959	1.67959	1.67959	1.67959	1.67959	8.43334	chr2	20454623	20460227	-	hsa_circ_0118850	circBase	NM_015317	PUM2	exonic	645
chrX:154448487-154464648+	-5.45125	5.90542	4.29173	0.0382982	0.432824	down	0	0	0	0	0	0	0	0	0	26	1.67959	1.67959	1.67959	1.67959	1.67959	1.67959	1.67959	1.67959	1.67959	8.43334	chrX	154448486	154464648	+	hsa_circ_0139937	circBase	NM_001303544	VBP1	sense overlapping	16162
chr10:32832228-32924086+	-5.45125	5.90542	4.29173	0.0382982	0.432824	down	0	0	0	0	0	0	0	0	0	26	1.67959	1.67959	1.67959	1.67959	1.67959	1.67959	1.67959	1.67959	1.67959	8.43334	chr10	32832227	32924086	+	hsa_circ_0093560	circBase	NM_024688	CCDC7	sense overlapping	91859
chr10:33093943-33123826+	-5.44303	5.9024	4.2766	0.0386406	0.432824	down	0	0	0	0	0	0	13	21	0	0	1.67959	1.67959	1.67959	1.67959	1.67959	1.67959	7.56304	7.28997	1.67959	1.67959	chr10	33093942	33123826	+		novel	NM_024688	CCDC7	exonic	339
chr6:84910507-84911485-	-5.44219	5.89924	4.26139	0.0389879	0.432824	down	0	0	0	0	0	0	22	0	0	2	1.67959	1.67959	1.67959	1.67959	1.67959	1.67959	8.312	1.67959	1.67959	4.88501	chr6	84910506	84911485	-		novel	NM_014895	CEP162	exonic	148
chr4:129857810-129920949-	-5.4418	5.9017	4.27313	0.0387196	0.432824	down	0	0	0	0	0	1	1	16	0	15	1.67959	1.67959	1.67959	1.67959	1.67959	3.74482	4.12957	6.90685	1.67959	7.64956	chr4	129857809	129920949	-	hsa_circ_0125322	circBase	NM_144643	SCLT1	exonic	1403
chr12:109509417-109511337+	-5.43897	5.9	4.26478	0.0389102	0.432824	down	0	0	0	0	0	0	3	17	0	13	1.67959	1.67959	1.67959	1.67959	1.67959	1.67959	5.52681	6.99205	1.67959	7.44664	chr12	109509416	109511337	+	hsa_circ_0028094	circBase	NM_032663	USP30	exonic	240
chr20:47691322-47706283+	-5.43896	5.89952	4.26248	0.038963	0.432824	down	0	0	0	0	0	0	15	17	0	0	1.67959	1.67959	1.67959	1.67959	1.67959	1.67959	7.76623	6.99205	1.67959	1.67959	chr20	47691321	47706283	+	hsa_circ_0060746	circBase	NM_001316	CSE1L	exonic	1115
chr2:58449077-58459247+	-5.4364	5.89886	4.2591	0.0390407	0.432824	down	0	0	0	0	0	13	0	10	0	10	1.67959	1.67959	1.67959	1.67959	1.67959	7.08575	1.67959	6.25171	1.67959	7.07606	chr2	58449076	58459247	+		novel	T189927	G043683	sense overlapping	10171
chr11:46860934-46861098-	-5.43499	5.89847	4.25761	0.0390748	0.432824	down	0	0	0	0	0	33	0	0	0	0	1.67959	1.67959	1.67959	1.67959	1.67959	8.40894	1.67959	1.67959	1.67959	1.67959	chr11	46860933	46861098	-		novel	ENST00000415402	CKAP5	intronic	165
chr19:16503115-16504812-	-5.43499	5.89847	4.25761	0.0390748	0.432824	down	0	0	0	0	0	33	0	0	0	0	1.67959	1.67959	1.67959	1.67959	1.67959	8.40894	1.67959	1.67959	1.67959	1.67959	chr19	16503114	16504812	-		novel	NM_021235	EPS15L1	exonic	188
chr3:38904686-38921614-	-5.43499	5.89847	4.25761	0.0390748	0.432824	down	0	0	0	0	0	33	0	0	0	0	1.67959	1.67959	1.67959	1.67959	1.67959	8.40894	1.67959	1.67959	1.67959	1.67959	chr3	38904685	38921614	-		novel	NM_014139	SCN11A	exonic	837
chr5:112116487-112137080+	-5.43419	5.89123	4.23391	0.0396241	0.432824	down	0	0	0	0	0	5	2	0	13	0	1.67959	1.67959	1.67959	1.67959	1.67959	5.76067	4.99112	1.67959	8.05022	1.67959	chr5	112116486	112137080	+	hsa_circ_0127616	circBase	NM_000038	APC	exonic	303
chr12:102128705-102131076-	-5.433	5.88879	4.22583	0.0398132	0.432824	down	0	0	0	0	0	0	0	0	17	0	1.67959	1.67959	1.67959	1.67959	1.67959	1.67959	1.67959	1.67959	8.43313	1.67959	chr12	102128704	102131076	-		novel	NM_153694	SYCP3	exonic	220
chr11:75715049-75718665+	-5.433	5.88879	4.22583	0.0398132	0.432824	down	0	0	0	0	0	0	0	0	17	0	1.67959	1.67959	1.67959	1.67959	1.67959	1.67959	1.67959	1.67959	8.43313	1.67959	chr11	75715048	75718665	+		novel	NM_003369	UVRAG	exonic	173
chr2:15542292-15618413-	-5.433	5.88879	4.22583	0.0398132	0.432824	down	0	0	0	0	0	0	0	0	17	0	1.67959	1.67959	1.67959	1.67959	1.67959	1.67959	1.67959	1.67959	8.43313	1.67959	chr2	15542291	15618413	-		novel	NM_015909	NBAS	exonic	1988
chr9:34241183-34242106+	-5.433	5.88879	4.22583	0.0398132	0.432824	down	0	0	0	0	0	0	0	0	17	0	1.67959	1.67959	1.67959	1.67959	1.67959	1.67959	1.67959	1.67959	8.43313	1.67959	chr9	34241182	34242106	+	hsa_circ_0006212	circBase	NM_016525	UBAP1	exonic	924
chr5:68400458-68404263+	-5.433	5.88879	4.22583	0.0398132	0.432824	down	0	0	0	0	0	0	0	0	17	0	1.67959	1.67959	1.67959	1.67959	1.67959	1.67959	1.67959	1.67959	8.43313	1.67959	chr5	68400457	68404263	+		PMID:25242744	NM_022902	SLC30A5	exonic	174
chr18:43560071-43595903-	-5.433	5.88879	4.22583	0.0398132	0.432824	down	0	0	0	0	0	0	0	0	17	0	1.67959	1.67959	1.67959	1.67959	1.67959	1.67959	1.67959	1.67959	8.43313	1.67959	chr18	43560070	43595903	-		novel	NM_024430	PSTPIP2	sense overlapping	35833
chr5:94244956-94289065-	-5.433	5.88879	4.22583	0.0398132	0.432824	down	0	0	0	0	0	0	0	0	17	0	1.67959	1.67959	1.67959	1.67959	1.67959	1.67959	1.67959	1.67959	8.43313	1.67959	chr5	94244955	94289065	-	hsa_circ_0130057	circBase	NM_024717	MCTP1	exonic	814
chr15:63349184-63354844+	-5.433	5.88879	4.22583	0.0398132	0.432824	down	0	0	0	0	0	0	0	0	17	0	1.67959	1.67959	1.67959	1.67959	1.67959	1.67959	1.67959	1.67959	8.43313	1.67959	chr15	63349183	63354844	+		novel	NM_000366	TPM1	exonic	532
chr11:120318583-120330029+	-5.433	5.88879	4.22583	0.0398132	0.432824	down	0	0	0	0	0	0	0	0	17	0	1.67959	1.67959	1.67959	1.67959	1.67959	1.67959	1.67959	1.67959	8.43313	1.67959	chr11	120318582	120330029	+	hsa_circ_0095185	circBase	NM_015313	ARHGEF12	exonic	938
chr8:101960951-101964204-	-5.433	5.88879	4.22583	0.0398132	0.432824	down	0	0	0	0	0	0	0	0	17	0	1.67959	1.67959	1.67959	1.67959	1.67959	1.67959	1.67959	1.67959	8.43313	1.67959	chr8	101960950	101964204	-		novel	NM_003406	YWHAZ	sense overlapping	3254
chr8:68172050-68189692-	-5.433	5.88879	4.22583	0.0398132	0.432824	down	0	0	0	0	0	0	0	0	17	0	1.67959	1.67959	1.67959	1.67959	1.67959	1.67959	1.67959	1.67959	8.43313	1.67959	chr8	68172049	68189692	-	hsa_circ_0136996	circBase	NM_006421	ARFGEF1	exonic	1208
chr1:21377359-21415706+	-5.43235	5.89645	4.25079	0.039232	0.432824	down	0	0	0	0	0	31	0	0	1	0	1.67959	1.67959	1.67959	1.67959	1.67959	8.31962	1.67959	1.67959	4.54515	1.67959	chr1	21377358	21415706	+		novel	NM_003760	EIF4G3	antisense	38348
chr2:37143221-37152351-	-5.42777	5.8897	4.22835	0.039754	0.432824	down	0	0	0	0	0	0	0	16	11	0	1.67959	1.67959	1.67959	1.67959	1.67959	1.67959	1.67959	6.90685	7.81238	1.67959	chr2	37143220	37152351	-	hsa_circ_0054040	circBase	NM_003162	STRN	exonic	178
chr1:224592132-224601037-	-5.42662	5.8946	4.24424	0.0393836	0.432824	down	0	0	0	0	0	0	6	34	0	0	1.67959	1.67959	1.67959	1.67959	1.67959	1.67959	6.4758	7.97378	1.67959	1.67959	chr1	224592131	224601037	-		novel	ENST00000366852	WDR26	exonic	363
chr17:40476729-40477079-	-5.41374	5.88212	4.20236	0.0403677	0.432824	down	0	0	0	0	0	17	0	0	8	0	1.67959	1.67959	1.67959	1.67959	1.67959	7.46475	1.67959	1.67959	7.36063	1.67959	chr17	40476728	40477079	-	hsa_circ_0043812	circBase	NM_003150	STAT3	exonic	235
chr8:104053026-104054635+	-5.40995	5.88468	4.21037	0.0401775	0.432824	down	0	0	0	0	0	0	0	29	0	9	1.67959	1.67959	1.67959	1.67959	1.67959	1.67959	1.67959	7.74747	1.67959	6.92785	chr8	104053025	104054635	+	hsa_circ_0085287	circBase	NM_001695	ATP6V1C1	exonic	239
chr12:53848534-53858815+	-5.40803	5.88535	4.21241	0.0401293	0.432824	down	0	0	0	0	0	0	0	45	0	0	1.67959	1.67959	1.67959	1.67959	1.67959	1.67959	1.67959	8.37367	1.67959	1.67959	chr12	53848533	53858815	+		novel	NM_005016	PCBP2	sense overlapping	10282
chr4:159634271-159636820-	-5.40159	5.87756	4.18635	0.0407506	0.432824	down	0	0	0	0	0	15	5	0	0	8	1.67959	1.67959	1.67959	1.67959	1.67959	7.28766	6.22311	1.67959	1.67959	6.76267	chr4	159634270	159636820	-	hsa_circ_0125643	circBase	ENST00000512699	PPID	exonic	356
chr8:61484605-61497374+	-5.39888	5.87888	4.19045	0.0406524	0.432824	down	0	0	0	0	0	0	0	34	0	6	1.67959	1.67959	1.67959	1.67959	1.67959	1.67959	1.67959	7.97378	1.67959	6.36175	chr8	61484604	61497374	+		PMID:25242744	NM_002865	RAB2A	exonic	244
chr8:38793512-38803739+	-5.39598	5.87334	4.17203	0.0410966	0.432824	down	0	0	0	0	0	0	0	0	0	25	1.67959	1.67959	1.67959	1.67959	1.67959	1.67959	1.67959	1.67959	1.67959	8.37729	chr8	38793511	38803739	+	hsa_circ_0084018	circBase	NM_021623	PLEKHA2	exonic	204
chr12:105742380-105789491+	-5.39174	5.87346	4.17206	0.0410958	0.432824	down	0	0	0	0	0	32	0	0	0	0	1.67959	1.67959	1.67959	1.67959	1.67959	8.36497	1.67959	1.67959	1.67959	1.67959	chr12	105742379	105789491	+		novel	NM_001145199	C12orf75	sense overlapping	47112
chr21:35475134-35497780+	-5.39174	5.87346	4.17206	0.0410958	0.432824	down	0	0	0	0	0	32	0	0	0	0	1.67959	1.67959	1.67959	1.67959	1.67959	8.36497	1.67959	1.67959	1.67959	1.67959	chr21	35475133	35497780	+	hsa_circ_0005076	circBase	ENST00000477091	MRPS6	exonic	237
chr2:61147176-61149134+	-5.39174	5.87346	4.17206	0.0410958	0.432824	down	0	0	0	0	0	32	0	0	0	0	1.67959	1.67959	1.67959	1.67959	1.67959	8.36497	1.67959	1.67959	1.67959	1.67959	chr2	61147175	61149134	+	hsa_circ_0120525	circBase	NM_002908	REL	sense overlapping	1959
chr7:66236870-66264401+	-5.39174	5.87346	4.17206	0.0410958	0.432824	down	0	0	0	0	0	32	0	0	0	0	1.67959	1.67959	1.67959	1.67959	1.67959	8.36497	1.67959	1.67959	1.67959	1.67959	chr7	66236869	66264401	+	hsa_circ_0080359	circBase	NM_014504	RABGEF1	exonic	837
chr3:47719688-47721998-	-5.39174	5.87346	4.17206	0.0410958	0.432824	down	0	0	0	0	0	32	0	0	0	0	1.67959	1.67959	1.67959	1.67959	1.67959	8.36497	1.67959	1.67959	1.67959	1.67959	chr3	47719687	47721998	-	hsa_circ_0065277	circBase	NM_003074	SMARCC1	exonic	186
chr8:17123416-17137952+	-5.39124	5.86963	4.15947	0.0414025	0.432824	down	0	0	0	0	0	0	23	0	0	0	1.67959	1.67959	1.67959	1.67959	1.67959	1.67959	8.3755	1.67959	1.67959	1.67959	chr8	17123415	17137952	+		novel	NM_152415	VPS37A	exonic	844
chr10:74937604-74953351+	-5.39124	5.86963	4.15947	0.0414025	0.432824	down	0	0	0	0	0	0	23	0	0	0	1.67959	1.67959	1.67959	1.67959	1.67959	1.67959	8.3755	1.67959	1.67959	1.67959	chr10	74937603	74953351	+		novel	NM_173348	FAM149B1	exonic	390
chr11:120224414-120278532+	-5.39124	5.86963	4.15947	0.0414025	0.432824	down	0	0	0	0	0	0	23	0	0	0	1.67959	1.67959	1.67959	1.67959	1.67959	1.67959	8.3755	1.67959	1.67959	1.67959	chr11	120224413	120278532	+		novel	NM_015313	ARHGEF12	sense overlapping	54119
chr3:134251620-134270854+	-5.39124	5.86963	4.15947	0.0414025	0.432824	down	0	0	0	0	0	0	23	0	0	0	1.67959	1.67959	1.67959	1.67959	1.67959	1.67959	8.3755	1.67959	1.67959	1.67959	chr3	134251619	134270854	+		novel	NM_025180	CEP63	exonic	1149
chr10:32912647-32914072+	-5.39124	5.86963	4.15947	0.0414025	0.432824	down	0	0	0	0	0	0	23	0	0	0	1.67959	1.67959	1.67959	1.67959	1.67959	1.67959	8.3755	1.67959	1.67959	1.67959	chr10	32912646	32914072	+		novel	ENST00000375025	C10ORF68	intronic	1426
chr19:13054351-13054802+	-5.39124	5.86963	4.15947	0.0414025	0.432824	down	0	0	0	0	0	0	23	0	0	0	1.67959	1.67959	1.67959	1.67959	1.67959	1.67959	8.3755	1.67959	1.67959	1.67959	chr19	13054350	13054802	+		novel	NM_004343	CALR	sense overlapping	452
chr12:32777910-32786623+	-5.3892	5.86694	4.15049	0.0416226	0.432824	down	0	0	0	0	0	0	16	0	5	0	1.67959	1.67959	1.67959	1.67959	1.67959	1.67959	7.85801	1.67959	6.69934	1.67959	chr12	32777909	32786623	+		PMID:25242744	NM_139241	FGD4	exonic	360
chr20:33523379-33524826-	-5.37653	5.86726	4.15039	0.041625	0.432824	down	0	0	0	0	0	0	0	44	0	0	1.67959	1.67959	1.67959	1.67959	1.67959	1.67959	1.67959	8.34157	1.67959	1.67959	chr20	33523378	33524826	-	hsa_circ_0060017	circBase	NM_000178	GSS	exonic	226
chr6:136693639-136710655-	-5.37653	5.86726	4.15039	0.041625	0.432824	down	0	0	0	0	0	0	0	44	0	0	1.67959	1.67959	1.67959	1.67959	1.67959	1.67959	1.67959	8.34157	1.67959	1.67959	chr6	136693638	136710655	-		novel	NM_003980	MAP7	exonic	632
chr20:31291825-31294562-	-5.37637	5.86284	4.13587	0.0419835	0.432824	down	0	0	0	0	0	14	9	0	0	4	1.67959	1.67959	1.67959	1.67959	1.67959	7.19023	7.04335	1.67959	1.67959	5.80461	chr20	31291824	31294562	-	hsa_circ_0059794	circBase	NM_053041	COMMD7	exonic	285
chr14:100808735-100809724-	-5.37559	5.85609	4.11364	0.0425387	0.432824	down	0	0	0	0	0	0	0	0	15	2	1.67959	1.67959	1.67959	1.67959	1.67959	1.67959	1.67959	1.67959	8.25434	4.88501	chr14	100808734	100809724	-		novel	NM_004184	WARS	exonic	287
chr8:131300497-131302384-	-5.37203	5.86123	4.1302	0.0421244	0.432824	down	0	0	0	0	0	20	0	0	0	9	1.67959	1.67959	1.67959	1.67959	1.67959	7.69528	1.67959	1.67959	1.67959	6.92785	chr8	131300496	131302384	-		novel	ENST00000357668	ASAP1	intronic	1888
chr1:207532891-207536124+	-5.37156	5.86237	4.13388	0.0420329	0.432824	down	0	0	0	0	0	0	0	26	0	10	1.67959	1.67959	1.67959	1.67959	1.67959	1.67959	1.67959	7.5924	1.67959	7.07606	chr1	207532890	207536124	+		novel	NM_000574	CD55	sense overlapping	3234
chr15:57345726-57356021+	-5.36789	5.85475	4.10855	0.0426669	0.432824	down	0	0	0	0	0	0	0	7	9	7	1.67959	1.67959	1.67959	1.67959	1.67959	1.67959	1.67959	5.7629	7.52743	6.57609	chr15	57345725	57356021	+		novel	ENST00000452095	TCF12	intronic	10296
chr10:98667022-98704002+	-5.36782	5.8572	4.11658	0.0424649	0.432824	down	0	0	0	0	0	0	19	7	0	0	1.67959	1.67959	1.67959	1.67959	1.67959	1.67959	8.10279	5.7629	1.67959	1.67959	chr10	98667021	98704002	+	hsa_circ_0019314	circBase	NM_032440	LCOR	exonic	279
chr3:15849160-15855816-	-5.35304	5.8481	4.08535	0.0432564	0.432824	down	0	0	0	0	0	0	15	0	0	8	1.67959	1.67959	1.67959	1.67959	1.67959	1.67959	7.76623	1.67959	1.67959	6.76267	chr3	15849159	15855816	-		novel	ENST00000412318	ANKRD28	intronic	6657
chrX:13762534-13767652+	-5.34804	5.84677	4.08052	0.0433803	0.432824	down	0	0	0	0	0	13	11	2	0	1	1.67959	1.67959	1.67959	1.67959	1.67959	7.08575	7.32647	4.15401	1.67959	4.03351	chrX	13762533	13767652	+	hsa_circ_0089902	circBase	NM_003611	OFD1	exonic	523
chr10:22737654-22737918+	-5.34714	5.848	4.08447	0.0432789	0.432824	down	0	0	0	0	0	31	0	0	0	0	1.67959	1.67959	1.67959	1.67959	1.67959	8.31962	1.67959	1.67959	1.67959	1.67959	chr10	22737653	22737918	+		novel	ENST00000487973	SPAG6	exonic	265
chrX:17024344-17047746+	-5.34714	5.848	4.08447	0.0432789	0.432824	down	0	0	0	0	0	31	0	0	0	0	1.67959	1.67959	1.67959	1.67959	1.67959	8.31962	1.67959	1.67959	1.67959	1.67959	chrX	17024343	17047746	+	hsa_circ_0139982	circBase	NM_004726	REPS2	exonic	498
chr2:203921150-203949292+	-5.34714	5.848	4.08447	0.0432789	0.432824	down	0	0	0	0	0	31	0	0	0	0	1.67959	1.67959	1.67959	1.67959	1.67959	8.31962	1.67959	1.67959	1.67959	1.67959	chr2	203921149	203949292	+	hsa_circ_0118758	circBase	NM_001114132	NBEAL1	exonic	793
chr20:45910846-45923523-	-5.34714	5.848	4.08447	0.0432789	0.432824	down	0	0	0	0	0	31	0	0	0	0	1.67959	1.67959	1.67959	1.67959	1.67959	8.31962	1.67959	1.67959	1.67959	1.67959	chr20	45910845	45923523	-	hsa_circ_0115311	circBase	NM_012408	ZMYND8	exonic	545
chr5:133685904-133695782-	-5.34714	5.848	4.08447	0.0432789	0.432824	down	0	0	0	0	0	31	0	0	0	0	1.67959	1.67959	1.67959	1.67959	1.67959	8.31962	1.67959	1.67959	1.67959	1.67959	chr5	133685903	133695782	-	hsa_circ_0127991	circBase	ENST00000435240	CDKL3	intronic	9879
chr1:243288547-243289436-	-5.34714	5.848	4.08447	0.0432789	0.432824	down	0	0	0	0	0	31	0	0	0	0	1.67959	1.67959	1.67959	1.67959	1.67959	8.31962	1.67959	1.67959	1.67959	1.67959	chr1	243288546	243289436	-		novel	NM_014812	CEP170	sense overlapping	890
chr5:72012533-72012699+	-5.34714	5.848	4.08447	0.0432789	0.432824	down	0	0	0	0	0	31	0	0	0	0	1.67959	1.67959	1.67959	1.67959	1.67959	8.31962	1.67959	1.67959	1.67959	1.67959	chr5	72012532	72012699	+		novel	TCONS_l2_00023428	XLOC_l2_011627	intronic	167
chr7:37433425-37455277-	-5.34713	5.83933	4.05595	0.044016	0.432824	down	0	0	0	0	0	0	0	0	16	0	1.67959	1.67959	1.67959	1.67959	1.67959	1.67959	1.67959	1.67959	8.34651	1.67959	chr7	37433424	37455277	-		novel	NM_001206480	ELMO1	intronic	21853
chr6:532469-534580-	-5.34713	5.83933	4.05595	0.044016	0.432824	down	0	0	0	0	0	0	0	0	16	0	1.67959	1.67959	1.67959	1.67959	1.67959	1.67959	1.67959	1.67959	8.34651	1.67959	chr6	532468	534580	-	hsa_circ_0131914	circBase	NM_018303	EXOC2	sense overlapping	2112
chr3:155545971-155560342-	-5.34713	5.83933	4.05595	0.044016	0.432824	down	0	0	0	0	0	0	0	0	16	0	1.67959	1.67959	1.67959	1.67959	1.67959	1.67959	1.67959	1.67959	8.34651	1.67959	chr3	155545970	155560342	-		novel	NM_004733	SLC33A1	sense overlapping	14372
chr12:121002875-121009094+	-5.34713	5.83933	4.05595	0.044016	0.432824	down	0	0	0	0	0	0	0	0	16	0	1.67959	1.67959	1.67959	1.67959	1.67959	1.67959	1.67959	1.67959	8.34651	1.67959	chr12	121002874	121009094	+	hsa_circ_0005043	circBase	NM_014868	RNF10	exonic	477
chr4:110412483-110437796+	-5.34713	5.83933	4.05595	0.044016	0.432824	down	0	0	0	0	0	0	0	0	16	0	1.67959	1.67959	1.67959	1.67959	1.67959	1.67959	1.67959	1.67959	8.34651	1.67959	chr4	110412482	110437796	+	hsa_circ_0070637	circBase	NM_006323	SEC24B	exonic	961
chr13:96577934-96601708-	-5.34713	5.83933	4.05595	0.044016	0.432824	down	0	0	0	0	0	0	0	0	16	0	1.67959	1.67959	1.67959	1.67959	1.67959	1.67959	1.67959	1.67959	8.34651	1.67959	chr13	96577933	96601708	-	hsa_circ_0101070	circBase	NM_020121	UGGT2	exonic	960
chr14:59819244-59826222+	-5.34713	5.83933	4.05595	0.044016	0.432824	down	0	0	0	0	0	0	0	0	16	0	1.67959	1.67959	1.67959	1.67959	1.67959	1.67959	1.67959	1.67959	8.34651	1.67959	chr14	59819243	59826222	+		novel	NM_014992	DAAM1	exonic	473
chr1:100515465-100535241+	-5.34713	5.83933	4.05595	0.044016	0.432824	down	0	0	0	0	0	0	0	0	16	0	1.67959	1.67959	1.67959	1.67959	1.67959	1.67959	1.67959	1.67959	8.34651	1.67959	chr1	100515464	100535241	+	hsa_circ_0000096	circBase	NM_033055	HIAT1	exonic	807	Alzheimer's disease, B-cell chronic lymphocytic leukemia, Burkitt lymphoma, Down syndrome (DS), Duchenne muscular dystrophy (DMD), Hodgkin's lymphoma, Intrahepatic cholangiocarcinoma (ICC), acute lymphoblastic leukemia (ALL), acute myeloid leukemia (AML), acute promyelocytic leukemia (APL), adenoma, adrenocortical carcinoma, autism spectrum disorder (ASD), bladder cancer, breast cancer, cardiac h…
chr20:2945507-2996531+	-5.34713	5.83933	4.05595	0.044016	0.432824	down	0	0	0	0	0	0	0	0	16	0	1.67959	1.67959	1.67959	1.67959	1.67959	1.67959	1.67959	1.67959	8.34651	1.67959	chr20	2945506	2996531	+		novel	NM_002836	PTPRA	exonic	870
chrX:76907604-76919047-	-5.34432	5.84894	4.08729	0.0432068	0.432824	down	0	0	0	0	0	0	0	43	0	0	1.67959	1.67959	1.67959	1.67959	1.67959	1.67959	1.67959	8.30873	1.67959	1.67959	chrX	76907603	76919047	-		novel	ENST00000373344	ATRX	exonic	614
chr1:115153694-115164686-	-5.34432	5.84894	4.08729	0.0432068	0.432824	down	0	0	0	0	0	0	0	43	0	0	1.67959	1.67959	1.67959	1.67959	1.67959	1.67959	1.67959	8.30873	1.67959	1.67959	chr1	115153693	115164686	-		novel	NM_001256404	DENND2C	exonic	313
chr2:239241465-239242676+	-5.34432	5.84894	4.08729	0.0432068	0.432824	down	0	0	0	0	0	0	0	43	0	0	1.67959	1.67959	1.67959	1.67959	1.67959	1.67959	1.67959	8.30873	1.67959	1.67959	chr2	239241464	239242676	+		novel	NM_015650	TRAF3IP1	exonic	148
chr12:133624541-133625434+	-5.3385	5.84052	4.05904	0.0439354	0.432824	down	0	0	0	0	0	0	0	0	0	24	1.67959	1.67959	1.67959	1.67959	1.67959	1.67959	1.67959	1.67959	1.67959	8.31897	chr12	133624540	133625434	+		novel	NM_003428	ZNF84	exonic	223
chr17:65882244-65890281+	-5.3385	5.84052	4.05904	0.0439354	0.432824	down	0	0	0	0	0	0	0	0	0	24	1.67959	1.67959	1.67959	1.67959	1.67959	1.67959	1.67959	1.67959	1.67959	8.31897	chr17	65882243	65890281	+	hsa_circ_0045443	circBase	NM_004459	BPTF	exonic	868
chr1:94924163-94941293+	-5.3385	5.84052	4.05904	0.0439354	0.432824	down	0	0	0	0	0	0	0	0	0	24	1.67959	1.67959	1.67959	1.67959	1.67959	1.67959	1.67959	1.67959	1.67959	8.31897	chr1	94924162	94941293	+	hsa_circ_0114545	circBase	NM_002858	ABCD3	exonic	517
chr12:117365828-117387511+	-5.3385	5.84052	4.05904	0.0439354	0.432824	down	0	0	0	0	0	0	0	0	0	24	1.67959	1.67959	1.67959	1.67959	1.67959	1.67959	1.67959	1.67959	1.67959	8.31897	chr12	117365827	117387511	+	hsa_circ_0028605	circBase	NM_012174	FBXW8	exonic	359
chrM:5073-5337+	-5.33537	6.84654	6.55468	0.0104609	0.432824	down	0	0	0	1	0	83	0	4	0	0	1.67959	1.67959	1.67959	4.06556	1.67959	9.73137	1.67959	5.018	1.67959	1.67959	chrM	5072	5337	+		novel	T370381	G087361	intronic	265
chr8:27605594-27619975-	-5.33438	5.84084	4.05972	0.0439177	0.432824	down	0	0	0	0	0	30	0	1	0	0	1.67959	1.67959	1.67959	1.67959	1.67959	8.27279	1.67959	3.39273	1.67959	1.67959	chr8	27605593	27619975	-	hsa_circ_0136235	circBase	NM_018246	CCDC25	exonic	475
chr6:64337758-64337933-	-5.3286	5.83393	4.03643	0.0445278	0.432824	down	0	0	0	0	0	0	22	0	0	0	1.67959	1.67959	1.67959	1.67959	1.67959	1.67959	8.312	1.67959	1.67959	1.67959	chr6	64337757	64337933	-		novel			intergenic	176
chr11:77336008-77336860-	-5.32758	5.83799	4.0497	0.0441791	0.432824	down	0	0	0	0	0	0	0	30	0	7	1.67959	1.67959	1.67959	1.67959	1.67959	1.67959	1.67959	7.79566	1.67959	6.57609	chr11	77336007	77336860	-	hsa_circ_0096490	circBase	NM_001311202	CLNS1A	intronic	853
chr4:42545934-42577716-	-5.32284	5.83199	4.02949	0.0447113	0.432824	down	0	0	0	0	0	11	14	0	0	0	1.67959	1.67959	1.67959	1.67959	1.67959	6.85092	7.66821	1.67959	1.67959	1.67959	chr4	42545933	42577716	-	hsa_circ_0126433	circBase	NM_006095	ATP8A1	exonic	594
chr7:73520205-73520573-	-5.32151	5.83364	4.03481	0.0445707	0.432824	down	0	0	0	0	0	29	0	2	0	0	1.67959	1.67959	1.67959	1.67959	1.67959	8.2244	1.67959	4.15401	1.67959	1.67959	chr7	73520204	73520573	-		novel	NM_002314	LIMK1	antisense	369
chr10:103552596-103567658-	-5.31708	5.83006	4.02257	0.0448952	0.432824	down	0	0	0	0	0	22	6	0	0	0	1.67959	1.67959	1.67959	1.67959	1.67959	7.83076	6.4758	1.67959	1.67959	1.67959	chr10	103552595	103567658	-	hsa_circ_0019606	circBase	NM_012215	MGEA5	exonic	1695
chr12:10131565-10168326+	-5.31433	5.82938	4.02007	0.0449619	0.432824	down	0	0	0	0	0	29	0	0	0	1	1.67959	1.67959	1.67959	1.67959	1.67959	8.2244	1.67959	1.67959	1.67959	4.03351	chr12	10131564	10168326	+		novel	NM_138337	CLEC12A	sense overlapping	36762
chr7:65751498-65751696-	-5.31376	5.8257	4.0079	0.0452876	0.432824	down	0	0	0	0	0	0	19	0	0	3	1.67959	1.67959	1.67959	1.67959	1.67959	1.67959	8.10279	1.67959	1.67959	5.41688	chr7	65751497	65751696	-		novel	NM_003596	TPST1	antisense	199
chr4:71808540-71824757+	-5.3125	5.82598	4.00869	0.0452663	0.432824	down	0	0	0	0	0	0	0	1	0	23	1.67959	1.67959	1.67959	1.67959	1.67959	1.67959	1.67959	3.39273	1.67959	8.2582	chr4	71808539	71824757	+		novel	ENST00000502869	MOB1B	exonic	339
chr5:88057002-88119744-	-5.31138	5.83038	4.0231	0.0448813	0.432824	down	0	0	0	0	0	0	0	42	0	0	1.67959	1.67959	1.67959	1.67959	1.67959	1.67959	1.67959	8.27513	1.67959	1.67959	chr5	88057001	88119744	-		novel	NM_001193350	MEF2C	exonic	541
chr11:65202524-65211530+	-5.30131	5.82162	3.99326	0.0456827	0.432824	down	0	0	0	0	0	0	1	29	4	0	1.67959	1.67959	1.67959	1.67959	1.67959	1.67959	4.12957	7.74747	6.38848	1.67959	chr11	65202523	65211530	+		novel	NR_131012	NEAT1	sense overlapping	9007
chr6:136932420-136958544-	-5.30112	5.82209	3.99476	0.045642	0.432824	down	0	0	0	0	0	30	0	0	0	0	1.67959	1.67959	1.67959	1.67959	1.67959	8.27279	1.67959	1.67959	1.67959	1.67959	chr6	136932419	136958544	-		novel	NM_005923	MAP3K5	exonic	587
chr15:57535670-57555472+	-5.30112	5.82209	3.99476	0.045642	0.432824	down	0	0	0	0	0	30	0	0	0	0	1.67959	1.67959	1.67959	1.67959	1.67959	8.27279	1.67959	1.67959	1.67959	1.67959	chr15	57535669	57555472	+		novel	NM_003205	TCF12	exonic	638
chr7:30468990-30475697-	-5.30112	5.82209	3.99476	0.045642	0.432824	down	0	0	0	0	0	30	0	0	0	0	1.67959	1.67959	1.67959	1.67959	1.67959	8.27279	1.67959	1.67959	1.67959	1.67959	chr7	30468989	30475697	-		novel	NM_006092	NOD1	exonic	252
chr5:137661504-137665336-	-5.30112	5.82209	3.99476	0.045642	0.432824	down	0	0	0	0	0	30	0	0	0	0	1.67959	1.67959	1.67959	1.67959	1.67959	8.27279	1.67959	1.67959	1.67959	1.67959	chr5	137661503	137665336	-		PMID:25242744	NM_001790	CDC25C	exonic	265
chr17:1534670-1536008-	-5.30112	5.82209	3.99476	0.045642	0.432824	down	0	0	0	0	0	30	0	0	0	0	1.67959	1.67959	1.67959	1.67959	1.67959	8.27279	1.67959	1.67959	1.67959	1.67959	chr17	1534669	1536008	-		novel	T139430	G032555	antisense	1339
chr14:88476863-88477026-	-5.30112	5.82209	3.99476	0.045642	0.432824	down	0	0	0	0	0	30	0	0	0	0	1.67959	1.67959	1.67959	1.67959	1.67959	8.27279	1.67959	1.67959	1.67959	1.67959	chr14	88476862	88477026	-		novel	NM_003608	GPR65	antisense	164
chrX:117718698-117724265+	-5.294	6.81461	6.36094	0.011666	0.432824	down	0	0	0	1	0	25	21	37	0	2	1.67959	1.67959	1.67959	4.06556	1.67959	8.01274	8.24558	8.09428	1.67959	4.88501	chrX	117718697	117724265	+	hsa_circ_0091382	circBase	NM_144658	DOCK11	exonic	544
chr15:56683441-56687032+	-5.28795	5.81479	3.96941	0.0463341	0.432824	down	0	0	0	0	0	29	0	1	0	0	1.67959	1.67959	1.67959	1.67959	1.67959	8.2244	1.67959	3.39273	1.67959	1.67959	chr15	56683440	56687032	+	hsa_circ_0103950	circBase	NM_198524	TEX9	exonic	433
chr9:2096657-2123937+	-5.27864	5.80693	3.94252	0.0470802	0.432824	down	0	0	0	0	0	0	0	0	0	23	1.67959	1.67959	1.67959	1.67959	1.67959	1.67959	1.67959	1.67959	1.67959	8.2582	chr9	2096656	2123937	+	hsa_circ_0138482	circBase	NM_003070	SMARCA2	exonic	1098
chr9:114919780-114926798-	-5.27864	5.80693	3.94252	0.0470802	0.432824	down	0	0	0	0	0	0	0	0	0	23	1.67959	1.67959	1.67959	1.67959	1.67959	1.67959	1.67959	1.67959	1.67959	8.2582	chr9	114919779	114926798	-		novel	NR_036085	MIR3134	intronic	7019
chr15:72180345-72186119-	-5.27864	5.80693	3.94252	0.0470802	0.432824	down	0	0	0	0	0	0	0	0	0	23	1.67959	1.67959	1.67959	1.67959	1.67959	1.67959	1.67959	1.67959	1.67959	8.2582	chr15	72180344	72186119	-	hsa_circ_0036158	circBase	NM_006901	MYO9A	exonic	213
chr4:37841470-37841881+	-5.27864	5.80693	3.94252	0.0470802	0.432824	down	0	0	0	0	0	0	0	0	0	23	1.67959	1.67959	1.67959	1.67959	1.67959	1.67959	1.67959	1.67959	1.67959	8.2582	chr4	37841469	37841881	+		novel	NM_018290	PGM2	exonic	278
chr9:19286767-19316837+	-5.27864	5.80693	3.94252	0.0470802	0.432824	down	0	0	0	0	0	0	0	0	0	23	1.67959	1.67959	1.67959	1.67959	1.67959	1.67959	1.67959	1.67959	1.67959	8.2582	chr9	19286766	19316837	+	hsa_circ_0138390	circBase	NM_017925	DENND4C	exonic	1502
chr11:76637601-76670075+	-5.27864	5.80693	3.94252	0.0470802	0.432824	down	0	0	0	0	0	0	0	0	0	23	1.67959	1.67959	1.67959	1.67959	1.67959	1.67959	1.67959	1.67959	1.67959	8.2582	chr11	76637600	76670075	+		novel	NM_018367	ACER3	exonic	164
chrX:11196220-11204405-	-5.27864	5.80693	3.94252	0.0470802	0.432824	down	0	0	0	0	0	0	0	0	0	23	1.67959	1.67959	1.67959	1.67959	1.67959	1.67959	1.67959	1.67959	1.67959	8.2582	chrX	11196219	11204405	-		novel	NM_006125	ARHGAP6	sense overlapping	8186
chr7:72663923-72671572-	-5.27765	5.81158	3.95776	0.0466558	0.432824	down	0	0	0	0	0	0	0	41	0	0	1.67959	1.67959	1.67959	1.67959	1.67959	1.67959	1.67959	8.24073	1.67959	1.67959	chr7	72663922	72671572	-		novel	uc003txs.1	GTF2IRD2P1	exonic	468
chr5:169108734-169111354+	-5.27765	5.81158	3.95776	0.0466558	0.432824	down	0	0	0	0	0	0	0	41	0	0	1.67959	1.67959	1.67959	1.67959	1.67959	1.67959	1.67959	8.24073	1.67959	1.67959	chr5	169108733	169111354	+		novel	NM_004946	DOCK2	sense overlapping	2621
chr3:132400758-132411662-	-5.27467	5.80255	3.92766	0.047498	0.432824	down	0	0	0	0	0	0	0	14	10	0	1.67959	1.67959	1.67959	1.67959	1.67959	1.67959	1.67959	6.7197	7.67693	1.67959	chr3	132400757	132411662	-	hsa_circ_0121952	circBase	NR_037804	NPHP3-ACAD11	exonic	1679
chr2:26486248-26492865+	-5.26312	5.79732	3.90921	0.0480222	0.432824	down	0	0	0	0	0	0	21	0	0	0	1.67959	1.67959	1.67959	1.67959	1.67959	1.67959	8.24558	1.67959	1.67959	1.67959	chr2	26486247	26492865	+		novel	NM_000183	HADHB	exonic	145
chr2:45671401-45704214-	-5.26312	5.79732	3.90921	0.0480222	0.432824	down	0	0	0	0	0	0	21	0	0	0	1.67959	1.67959	1.67959	1.67959	1.67959	1.67959	8.24558	1.67959	1.67959	1.67959	chr2	45671400	45704214	-		novel	ENST00000475073	SRBD1	intronic	32814
chr7:23643705-23651172+	-5.26312	5.79732	3.90921	0.0480222	0.432824	down	0	0	0	0	0	0	21	0	0	0	1.67959	1.67959	1.67959	1.67959	1.67959	1.67959	8.24558	1.67959	1.67959	1.67959	chr7	23643704	23651172	+	hsa_circ_0133979	circBase	ENST00000448353	CCDC126	exonic	577
chr1:234534128-234536694-	-5.26312	5.79732	3.90921	0.0480222	0.432824	down	0	0	0	0	0	0	21	0	0	0	1.67959	1.67959	1.67959	1.67959	1.67959	1.67959	8.24558	1.67959	1.67959	1.67959	chr1	234534127	234536694	-		novel	ENST00000462259	TARBP1	exonic	268
chr7:132732941-132738938+	-5.26312	5.79732	3.90921	0.0480222	0.432824	down	0	0	0	0	0	0	21	0	0	0	1.67959	1.67959	1.67959	1.67959	1.67959	1.67959	8.24558	1.67959	1.67959	1.67959	chr7	132732940	132738938	+		novel	NM_017812	CHCHD3	antisense	5998
chr16:87741956-87745049-	-5.26312	5.79732	3.90921	0.0480222	0.432824	down	0	0	0	0	0	0	21	0	0	0	1.67959	1.67959	1.67959	1.67959	1.67959	1.67959	8.24558	1.67959	1.67959	1.67959	chr16	87741955	87745049	-		novel	NM_017566	KLHDC4	exonic	729
chr11:18362808-18363154+	-5.26312	5.79732	3.90921	0.0480222	0.432824	down	0	0	0	0	0	0	21	0	0	0	1.67959	1.67959	1.67959	1.67959	1.67959	1.67959	8.24558	1.67959	1.67959	1.67959	chr11	18362807	18363154	+		novel	NM_005316	GTF2H1	exonic	230
chr1:183102541-183104291+	-5.26312	5.79732	3.90921	0.0480222	0.432824	down	0	0	0	0	0	0	21	0	0	0	1.67959	1.67959	1.67959	1.67959	1.67959	1.67959	8.24558	1.67959	1.67959	1.67959	chr1	183102540	183104291	+		PMID:25070500	NM_002293	LAMC1	exonic	410
chr2:169404106-169417832+	-5.26312	5.79732	3.90921	0.0480222	0.432824	down	0	0	0	0	0	0	21	0	0	0	1.67959	1.67959	1.67959	1.67959	1.67959	1.67959	8.24558	1.67959	1.67959	1.67959	chr2	169404105	169417832	+	hsa_circ_0056939	circBase	NM_203463	CERS6	exonic	237
chr10:115636280-115668282+	-5.25587	5.78813	3.87807	0.0489208	0.432824	down	0	0	0	0	0	0	0	0	15	0	1.67959	1.67959	1.67959	1.67959	1.67959	1.67959	1.67959	1.67959	8.25434	1.67959	chr10	115636279	115668282	+		novel	NM_198514	NHLRC2	sense overlapping	32003
chr2:48725632-48738607+	-5.25587	5.78813	3.87807	0.0489208	0.432824	down	0	0	0	0	0	0	0	0	15	0	1.67959	1.67959	1.67959	1.67959	1.67959	1.67959	1.67959	1.67959	8.25434	1.67959	chr2	48725631	48738607	+	hsa_circ_0006911	circBase	NM_152994	PPP1R21	exonic	588
chr13:21429766-21442840-	-5.25587	5.78813	3.87807	0.0489208	0.432824	down	0	0	0	0	0	0	0	0	15	0	1.67959	1.67959	1.67959	1.67959	1.67959	1.67959	1.67959	1.67959	8.25434	1.67959	chr13	21429765	21442840	-	hsa_circ_0100050	circBase	NM_022459	XPO4	exonic	387
chr17:18454820-18498175-	-5.25587	5.78813	3.87807	0.0489208	0.432824	down	0	0	0	0	0	0	0	0	15	0	1.67959	1.67959	1.67959	1.67959	1.67959	1.67959	1.67959	1.67959	8.25434	1.67959	chr17	18454819	18498175	-		novel	NR_036647	CCDC144B	exonic	2346
chr14:55168780-55169298+	-5.25587	5.78813	3.87807	0.0489208	0.432824	down	0	0	0	0	0	0	0	0	15	0	1.67959	1.67959	1.67959	1.67959	1.67959	1.67959	1.67959	1.67959	8.25434	1.67959	chr14	55168779	55169298	+	hsa_circ_0004846	circBase	NM_015589	SAMD4A	exonic	519
chr2:32362178-32372327+	-5.25587	5.78813	3.87807	0.0489208	0.432824	down	0	0	0	0	0	0	0	0	15	0	1.67959	1.67959	1.67959	1.67959	1.67959	1.67959	1.67959	1.67959	8.25434	1.67959	chr2	32362177	32372327	+		novel	NM_014946	SPAST	exonic	315
chr18:3187478-3189085-	-5.25587	5.78813	3.87807	0.0489208	0.432824	down	0	0	0	0	0	0	0	0	15	0	1.67959	1.67959	1.67959	1.67959	1.67959	1.67959	1.67959	1.67959	8.25434	1.67959	chr18	3187477	3189085	-		novel	NM_003803	MYOM1	exonic	498
chrX:24190832-24191840+	-5.25587	5.78813	3.87807	0.0489208	0.432824	down	0	0	0	0	0	0	0	0	15	0	1.67959	1.67959	1.67959	1.67959	1.67959	1.67959	1.67959	1.67959	8.25434	1.67959	chrX	24190831	24191840	+		novel	ENST00000540034	ZFX	exonic	203
chr15:56471468-56473752-	-5.25587	5.78813	3.87807	0.0489208	0.432824	down	0	0	0	0	0	0	0	0	15	0	1.67959	1.67959	1.67959	1.67959	1.67959	1.67959	1.67959	1.67959	8.25434	1.67959	chr15	56471467	56473752	-		novel	NM_022841	RFX7	sense overlapping	2285
chrM:8399-8609+	-5.25358	5.79569	3.90282	0.0482052	0.432824	down	0	0	0	0	0	29	0	0	0	0	1.67959	1.67959	1.67959	1.67959	1.67959	8.2244	1.67959	1.67959	1.67959	1.67959	chrM	8398	8609	+		novel	uc011mfi.2	OK/SW-cl.16	sense overlapping	211
chr20:8737693-8746005+	-5.25358	5.79569	3.90282	0.0482052	0.432824	down	0	0	0	0	0	29	0	0	0	0	1.67959	1.67959	1.67959	1.67959	1.67959	8.2244	1.67959	1.67959	1.67959	1.67959	chr20	8737692	8746005	+		novel	NM_015192	PLCB1	exonic	407
chrX:67412761-67414340-	-5.25358	5.79569	3.90282	0.0482052	0.432824	down	0	0	0	0	0	29	0	0	0	0	1.67959	1.67959	1.67959	1.67959	1.67959	8.2244	1.67959	1.67959	1.67959	1.67959	chrX	67412760	67414340	-		novel	NM_002547	OPHN1	exonic	172
chr1:91382197-91383711-	-5.25358	5.79569	3.90282	0.0482052	0.432824	down	0	0	0	0	0	29	0	0	0	0	1.67959	1.67959	1.67959	1.67959	1.67959	8.2244	1.67959	1.67959	1.67959	1.67959	chr1	91382196	91383711	-	hsa_circ_0114419	circBase	NM_016620	ZNF644	sense overlapping	1515
chr16:69703885-69724874+	-5.25358	5.79569	3.90282	0.0482052	0.432824	down	0	0	0	0	0	29	0	0	0	0	1.67959	1.67959	1.67959	1.67959	1.67959	8.2244	1.67959	1.67959	1.67959	1.67959	chr16	69703884	69724874	+		novel	ENST00000565301	NFAT5	intronic	20990
chr17:4210316-4211641-	-5.25358	5.79569	3.90282	0.0482052	0.432824	down	0	0	0	0	0	29	0	0	0	0	1.67959	1.67959	1.67959	1.67959	1.67959	8.2244	1.67959	1.67959	1.67959	1.67959	chr17	4210315	4211641	-		novel	NM_003342	UBE2G1	sense overlapping	1326
chr3:33087612-33099761-	-5.24312	5.79252	3.89124	0.0485385	0.432824	down	0	0	0	0	0	0	0	40	0	0	1.67959	1.67959	1.67959	1.67959	1.67959	1.67959	1.67959	8.20549	1.67959	1.67959	chr3	33087611	33099761	-	hsa_circ_0064707	circBase	NM_000404	GLB1	exonic	516
chr1:220364410-220383831-	-5.24312	5.79252	3.89124	0.0485385	0.432824	down	0	0	0	0	0	0	0	40	0	0	1.67959	1.67959	1.67959	1.67959	1.67959	1.67959	1.67959	8.20549	1.67959	1.67959	chr1	220364409	220383831	-		novel	NM_012414	RAB3GAP2	exonic	977
chr9:136272931-136273966-	-5.24312	5.79252	3.89124	0.0485385	0.432824	down	0	0	0	0	0	0	0	40	0	0	1.67959	1.67959	1.67959	1.67959	1.67959	1.67959	1.67959	8.20549	1.67959	1.67959	chr9	136272930	136273966	-	hsa_circ_0089370	circBase	NR_103995	REXO4	exonic	150
chr9:100092436-100117290+	-5.24312	5.79252	3.89124	0.0485385	0.432824	down	0	0	0	0	0	0	0	40	0	0	1.67959	1.67959	1.67959	1.67959	1.67959	1.67959	1.67959	8.20549	1.67959	1.67959	chr9	100092435	100117290	+		novel	NM_020893	CCDC180	exonic	1476
chr2:61492532-61493302-	-5.24312	5.79252	3.89124	0.0485385	0.432824	down	0	0	0	0	0	0	0	40	0	0	1.67959	1.67959	1.67959	1.67959	1.67959	1.67959	1.67959	8.20549	1.67959	1.67959	chr2	61492531	61493302	-	hsa_circ_0054802	circBase	NM_014709	USP34	exonic	345
chr5:76342172-76342502+	-5.24004	5.78602	3.86943	0.0491731	0.432824	down	0	0	0	0	0	0	16	9	0	0	1.67959	1.67959	1.67959	1.67959	1.67959	1.67959	7.85801	6.10643	1.67959	1.67959	chr5	76342171	76342502	+	hsa_circ_0129665	circBase	NM_018046	AGGF1	exonic	331
chr17:15391202-15391648-	-5.23285	5.78113	3.85247	0.0496727	0.432824	down	0	0	0	0	0	0	19	3	0	0	1.67959	1.67959	1.67959	1.67959	1.67959	1.67959	8.10279	4.64974	1.67959	1.67959	chr17	15391201	15391648	-		novel	ENST00000481756	TVP23C-CDRT4	intronic	447
chr18:76870355-76886375+	-5.2322	5.78324	3.8594	0.049468	0.432824	down	0	0	0	0	0	23	4	0	0	0	1.67959	1.67959	1.67959	1.67959	1.67959	7.894	5.91657	1.67959	1.67959	1.67959	chr18	76870354	76886375	+	hsa_circ_0108901	circBase	NM_198531	ATP9B	exonic	374
chr3:138244332-138291774-	-5.22621	5.7808	3.85069	0.0497256	0.432824	down	0	0	0	0	0	27	0	2	0	0	1.67959	1.67959	1.67959	1.67959	1.67959	8.12245	1.67959	4.15401	1.67959	1.67959	chr3	138244331	138291774	-	hsa_circ_0122121	circBase	NM_024491	CEP70	exonic	949
chr12:5915218-5941769-	-5.2187	6.75146	5.98567	0.0144226	0.432824	down	1	0	0	0	0	1	0	0	40	0	4.05022	1.67959	1.67959	1.67959	1.67959	3.74482	1.67959	1.67959	9.65989	1.67959	chr12	5915217	5941769	-		novel	ENST00000327087	ANO2	exonic	357
chr6:159004986-159010814+	-5.19532	6.70247	5.80461	0.0159842	0.432824	down	0	1	0	0	0	74	0	0	0	1	1.67959	3.95891	1.67959	1.67959	1.67959	9.56644	1.67959	1.67959	1.67959	4.03351	chr6	159004985	159010814	+	hsa_circ_0001663	circBase	NM_020823	TMEM181	exonic	324
chr1:227348244-227441856-	-5.15998	6.67572	5.65282	0.0174273	0.432824	down	0	1	0	0	0	62	2	12	0	0	1.67959	3.95891	1.67959	1.67959	1.67959	9.31237	4.99112	6.5046	1.67959	1.67959	chr1	227348243	227441856	-	hsa_circ_0016752	circBase	NM_003607	CDC42BPA	exonic	515
chr2:61295984-61297635+	-5.14887	6.704	5.71136	0.0168555	0.432824	down	0	0	0	1	0	7	32	8	0	14	1.67959	1.67959	1.67959	4.06556	1.67959	6.22154	8.84802	5.94486	1.67959	7.55166	chr2	61295983	61297635	+	hsa_circ_0120528	circBase	NM_032506	KIAA1841	exonic	296
chr6:109466422-109477080+	-5.03815	6.62203	5.26027	0.0218177	0.432824	down	0	0	0	1	0	38	0	44	0	0	1.67959	1.67959	1.67959	4.06556	1.67959	8.61068	1.67959	8.34157	1.67959	1.67959	chr6	109466421	109477080	+		novel	NM_173830	CEP57L1	exonic	747
chr2:224749365-224760347-	-5.02301	6.60431	5.16532	0.0230422	0.432824	down	1	0	0	0	0	20	0	0	25	0	4.05022	1.67959	1.67959	1.67959	1.67959	7.69528	1.67959	1.67959	8.98524	1.67959	chr2	224749364	224760347	-	hsa_circ_0005853	circBase	NM_020830	WDFY1	exonic	335
chr7:155457869-155477746+	-4.94359	7.10595	6.712	0.00957661	0.432824	down	1	0	0	1	0	0	1	11	50	0	4.05022	1.67959	1.67959	4.06556	1.67959	1.67959	4.12957	6.38369	9.98067	1.67959	chr7	155457868	155477746	+	hsa_circ_0133751	circBase	ENST00000392759	RBM33	exonic	644
chr12:88509255-88510310-	-4.92633	6.5006	4.71272	0.0299402	0.432824	down	0	1	0	0	0	0	0	0	32	0	1.67959	3.95891	1.67959	1.67959	1.67959	1.67959	1.67959	1.67959	9.33939	1.67959	chr12	88509254	88510310	-		novel	ENST00000309041	CEP290	intronic	1056
chrX:76812922-76814317-	-4.92494	6.53225	4.79355	0.0285665	0.432824	down	1	0	0	0	0	0	0	0	25	12	4.05022	1.67959	1.67959	1.67959	1.67959	1.67959	1.67959	1.67959	8.98524	7.33337	chrX	76812921	76814317	-	hsa_circ_0002227	circBase	ENST00000373344	ATRX	exonic	373
chr17:45479498-45481999+	-4.86434	6.99199	6.20314	0.0127524	0.432824	down	0	2	0	0	0	7	0	15	28	19	1.67959	4.80209	1.67959	1.67959	1.67959	6.22154	1.67959	6.81631	9.14776	7.98574	chr17	45479497	45481999	+		novel	NM_152347	EFCAB13	exonic	288
chr12:42604157-42606286-	-4.80466	6.41444	4.29798	0.0381576	0.432824	down	0	1	0	0	0	0	23	5	11	0	1.67959	3.95891	1.67959	1.67959	1.67959	1.67959	8.3755	5.31112	7.81238	1.67959	chr12	42604156	42606286	-	hsa_circ_0007161	circBase	ENST00000552928	YAF2	exonic	274
chr6:76385151-76388643+	-4.71999	6.35473	4.01449	0.0451108	0.432824	down	0	1	0	0	0	0	0	17	20	2	1.67959	3.95891	1.67959	1.67959	1.67959	1.67959	1.67959	6.99205	8.66559	4.88501	chr6	76385150	76388643	+	hsa_circ_0132312	circBase	NM_015571	SENP6	exonic	683
chr4:56883814-56885721+	-4.69427	6.34026	3.95348	0.0467745	0.432824	down	0	1	0	0	0	16	1	49	0	0	1.67959	3.95891	1.67959	1.67959	1.67959	7.37892	4.12957	8.49539	1.67959	1.67959	chr4	56883813	56885721	+	hsa_circ_0069819	circBase	NM_025009	CEP135	exonic	413
chr14:103915256-103923549+	-4.67462	6.36217	3.9664	0.046417	0.432824	down	0	0	0	1	0	0	23	0	0	17	1.67959	1.67959	1.67959	4.06556	1.67959	1.67959	8.3755	1.67959	1.67959	7.82742	chr14	103915255	103923549	+	hsa_circ_0101343	circBase	NM_002376	MARK3	exonic	186
chr5:130750764-130753308-	-4.6598	6.34803	3.91574	0.0478359	0.432824	down	1	0	0	0	0	53	0	0	0	0	4.05022	1.67959	1.67959	1.67959	1.67959	9.08732	1.67959	1.67959	1.67959	1.67959	chr5	130750763	130753308	-	hsa_circ_0127873	circBase	T288748	G067503	intronic	2545
chr7:72671516-72680625-	-4.55658	7.1669	6.15166	0.0131289	0.432824	down	0	1	0	2	0	52	9	0	24	0	1.67959	3.95891	1.67959	4.9205	1.67959	9.06001	7.04335	1.67959	8.92673	1.67959	chr7	72671515	72680625	-		novel	uc003txs.1	GTF2IRD2P1	exonic	234
chr15:66727365-66729230+	-4.47287	7.38606	6.68574	0.00971873	0.432824	down	0	2	0	2	0	0	0	0	57	17	1.67959	4.80209	1.67959	4.9205	1.67959	1.67959	1.67959	1.67959	10.1691	7.82742	chr15	66727364	66729230	+	hsa_circ_0008798	circBase	NM_002755	MAP2K1	exonic	358
chr2:24778884-24787299+	-4.42269	6.70512	4.52687	0.0333665	0.432824	down	0	0	0	2	0	57	9	0	1	2	1.67959	1.67959	1.67959	4.9205	1.67959	9.1917	7.04335	1.67959	4.54515	4.88501	chr2	24778883	24787299	+	hsa_circ_0119557	circBase	ENST00000469850	NCOA1	exonic	177
chr3:124420885-124431982+	-4.33509	6.64093	4.21077	0.0401682	0.432824	down	0	0	0	2	0	66	0	5	0	0	1.67959	1.67959	1.67959	4.9205	1.67959	9.40212	1.67959	5.31112	1.67959	1.67959	chr3	124420884	124431982	+	hsa_circ_0121726	circBase	NM_007064	KALRN	exonic	280
chr2:9437429-9468040+	-4.32538	7.29735	6.06358	0.0137997	0.432824	down	1	0	0	3	0	1	17	4	49	0	4.05022	1.67959	1.67959	5.45368	1.67959	3.74482	7.9443	5.018	9.95162	1.67959	chr2	9437428	9468040	+	hsa_circ_0121183	circBase	NM_003887	ASAP2	exonic	487
chr19:56874604-56874767-	-4.30433	6.61818	4.09513	0.0430069	0.432824	down	0	0	0	2	0	0	36	0	0	14	1.67959	1.67959	1.67959	4.9205	1.67959	1.67959	9.01683	1.67959	1.67959	7.55166	chr19	56874603	56874767	-		novel	ENST00000587340	ZSCAN5A	exonic	164
chr8:141799573-141813749-	-4.24985	6.57509	3.90186	0.0482326	0.432824	down	1	0	0	1	0	7	27	2	0	15	4.05022	1.67959	1.67959	4.06556	1.67959	6.22154	8.60476	4.15401	1.67959	7.64956	chr8	141799572	141813749	-	hsa_circ_0003066	circBase	NM_005607	PTK2	exonic	310
chr1:29313943-29323831+	-3.97485	6.7384	3.90397	0.048172	0.432824	down	0	0	0	3	0	47	11	16	0	1	1.67959	1.67959	1.67959	5.45368	1.67959	8.91508	7.32647	6.90685	1.67959	4.03351	chr1	29313942	29323831	+	hsa_circ_0011168	circBase	NM_203342	EPB41	exonic	873
chr4:170076631-170077830-	-3.82402	7.33795	5.09861	0.023945	0.432824	down	0	0	0	6	0	0	0	0	64	0	1.67959	1.67959	1.67959	6.39996	1.67959	1.67959	1.67959	1.67959	10.3358	1.67959	chr4	170076630	170077830	-	hsa_circ_0071422	circBase	NM_020870	SH3RF1	exonic	372
chr5:75948575-75950828+	-3.75462	7.02083	4.21789	0.0399998	0.432824	down	0	4	0	1	0	31	27	32	2	0	1.67959	5.71679	1.67959	4.06556	1.67959	8.31962	8.60476	7.88747	5.44262	1.67959	chr5	75948574	75950828	+		novel	NM_001285460	IQGAP2	exonic	226
chr17:60111148-60112969-	-3.57138	7.25898	4.40502	0.0358333	0.432824	down	0	4	0	3	0	62	0	18	11	15	1.67959	5.71679	1.67959	5.45368	1.67959	9.31237	1.67959	7.07249	7.81238	7.64956	chr17	60111147	60112969	-	hsa_circ_0004273	circBase	NM_005121	MED13	exonic	344
chr8:100515064-100523740+	-3.39842	7.43319	4.3856	0.0362437	0.432824	down	1	0	2	5	0	0	0	4	66	0	4.05022	1.67959	5.46253	6.14783	1.67959	1.67959	1.67959	5.018	10.3801	1.67959	chr8	100515063	100523740	+	hsa_circ_0135264	circBase	NM_017890	VPS13B	exonic	666
chr14:39646616-39647120+	-3.05866	7.74527	4.21068	0.0401703	0.432824	down	2	1	1	10	0	0	25	38	39	21	4.90353	3.95891	4.56371	7.11487	1.67959	1.67959	8.49468	8.13231	9.62351	8.12839	chr14	39646615	39647120	+	hsa_circ_0101800	circBase	NM_002687	PNN	exonic	244
chr17:64509454-64510584+	-2.49276	8.60786	3.89283	0.0484927	0.432824	down	6	15	5	13	0	60	39	71	4	101	6.3817	7.55776	6.72017	7.48566	1.67959	9.2653	9.13162	9.02645	6.38848	10.3811	chr17	64509453	64510584	+		PMID:25070500	ENST00000284384	PRKCA	intronic	1131
